# Supplementary material for: The LKB1-salt-inducible kinase pathway functions as a key gluconeogenic suppressor in the liver
Source: PubMed Central journal article supplement (PMC4143937; doi:10.1038/ncomms5535), 2014-08-04

**A: [related to Fig 1B (Line1)]: OrbiTrap MS2 data for m/z 515.2 2<sup>+</sup> :[M+H] = 1029.44  
 SIK2(Glucagon treatment) SsFPVEQR [S343](#)**

Extracted from: D:\A ProtDisc data\KPatel\_111215\_SIK2\KPatel\_111215\_02.RAW #1041 RT: 17.36  
 ITMS, CID, z=+2, Mono m/z=515.22247 Da, MH+=1029.43767 Da, Match Tol.=0.6 Da

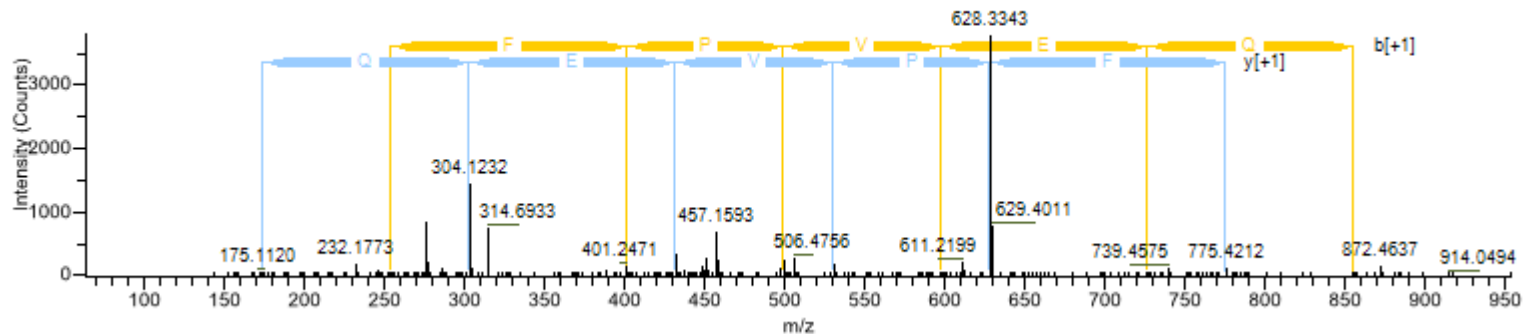

**S s[F]P[V]E[Q]R**

|        | (NH <sub>3</sub> <sup>+</sup> )-S | s/F          | F/P          | P/V          | V/E          | E/Q          | Q/R          | R-(COOH) |
|--------|-----------------------------------|--------------|--------------|--------------|--------------|--------------|--------------|----------|
| b (+1) | 88.0                              | <b>255.0</b> | <b>402.1</b> | <b>499.2</b> | <b>598.2</b> | <b>727.2</b> | <b>855.3</b> | 1011.4   |
| y (+1) | 942.4                             | <b>775.4</b> | <b>628.3</b> | <b>531.3</b> | <b>432.2</b> | <b>303.2</b> | <b>175.1</b> | 1029.4   |

This OrbiTrap data is ambiguous as it does not define sS or Ss, whereas QTrap data from SIK2 (Glucagon treatment) analyzed in Mascot does, see below.

A: continued [related to Fig 1B (Line1)]: QTrap MS2 data for  $m/z$  515.30  $2^+$  :[M+H] = 1029.57  
 SIK2(Glucagon treatment) SsFPVEQR [S343](#)

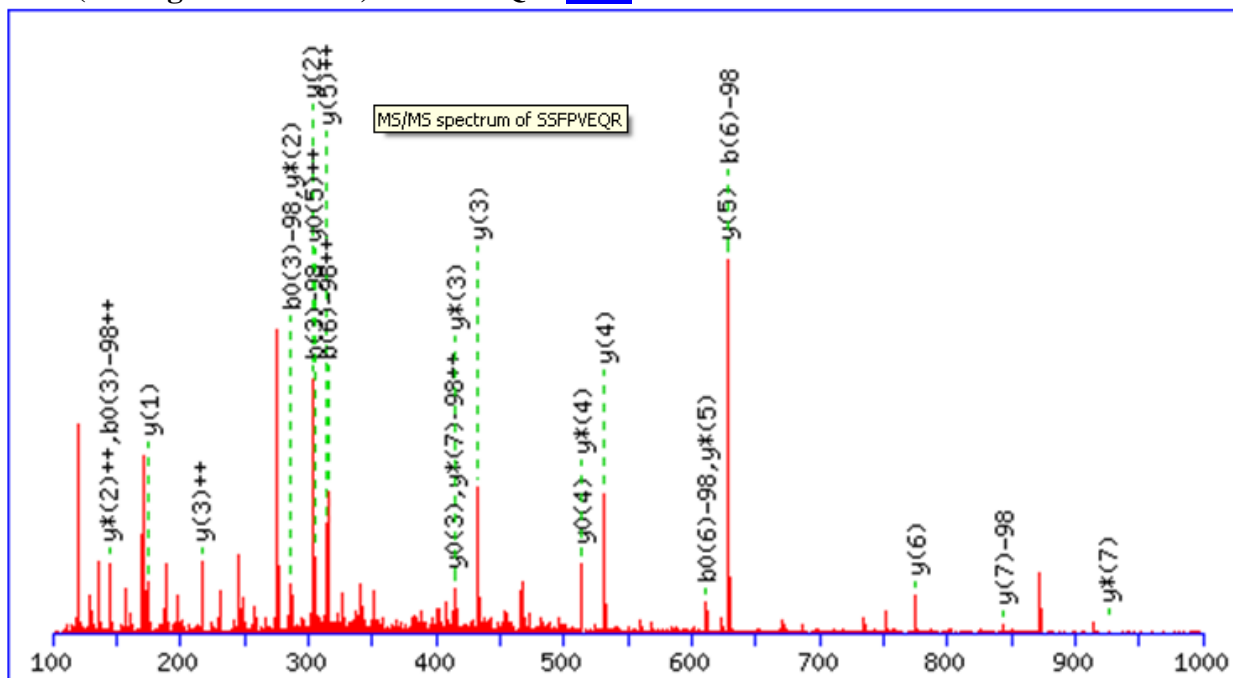

| # | b        | b <sup>++</sup> | b <sup>*</sup> | b <sup>*++</sup> | b <sup>0</sup> | b <sup>0++</sup> | Seq. | y        | y <sup>++</sup> | y <sup>*</sup> | y <sup>*++</sup> | y <sup>0</sup> | y <sup>0++</sup> | # |
|---|----------|-----------------|----------------|------------------|----------------|------------------|------|----------|-----------------|----------------|------------------|----------------|------------------|---|
| 1 | 88.0393  | 44.5233         |                |                  | 70.0287        | 35.5180          | S    |          |                 |                |                  |                |                  | 8 |
| 2 | 157.0608 | 79.0340         |                |                  | 139.0502       | 70.0287          | S    | 844.4312 | 422.7192        | 827.4046       | 414.2060         | 826.4206       | 413.7139         | 7 |
| 3 | 304.1292 | 152.5682        |                |                  | 286.1186       | 143.5629         | F    | 775.4097 | 388.2085        | 758.3832       | 379.6952         | 757.3991       | 379.2032         | 6 |
| 4 | 401.1819 | 201.0946        |                |                  | 383.1714       | 192.0893         | P    | 628.3413 | 314.6743        | 611.3148       | 306.1610         | 610.3307       | 305.6690         | 5 |
| 5 | 500.2504 | 250.6288        |                |                  | 482.2398       | 241.6235         | V    | 531.2885 | 266.1479        | 514.2620       | 257.6346         | 513.2780       | 257.1426         | 4 |
| 6 | 629.2930 | 315.1501        |                |                  | 611.2824       | 306.1448         | E    | 432.2201 | 216.6137        | 415.1936       | 208.1004         | 414.2096       | 207.6084         | 3 |
| 7 | 757.3515 | 379.1794        | 740.3250       | 370.6661         | 739.3410       | 370.1741         | Q    | 303.1775 | 152.0924        | 286.1510       | 143.5791         |                |                  | 2 |
| 8 |          |                 |                |                  |                |                  | R    | 175.1190 | 88.0631         | 158.0924       | 79.5498          |                |                  | 1 |

B: [related to Fig 1B (Line2)]: OrbiTrap MS2 data for m/z 690.8 2<sup>+</sup> :[M+H] = 1380.69

SIK2 (Glucagon treatment) RPsTIAEQTVAK [S358](#)

Extracted from: D:\A ProtDisc data\KPatel\_111215 SIK2\KPatel\_111215\_02.RAW #692 RT: 14.28  
ITMS, CID, z=+2, Mono m/z=690.84753 Da, MH+=1380.68779 Da, Match Tol.=0.6 Da

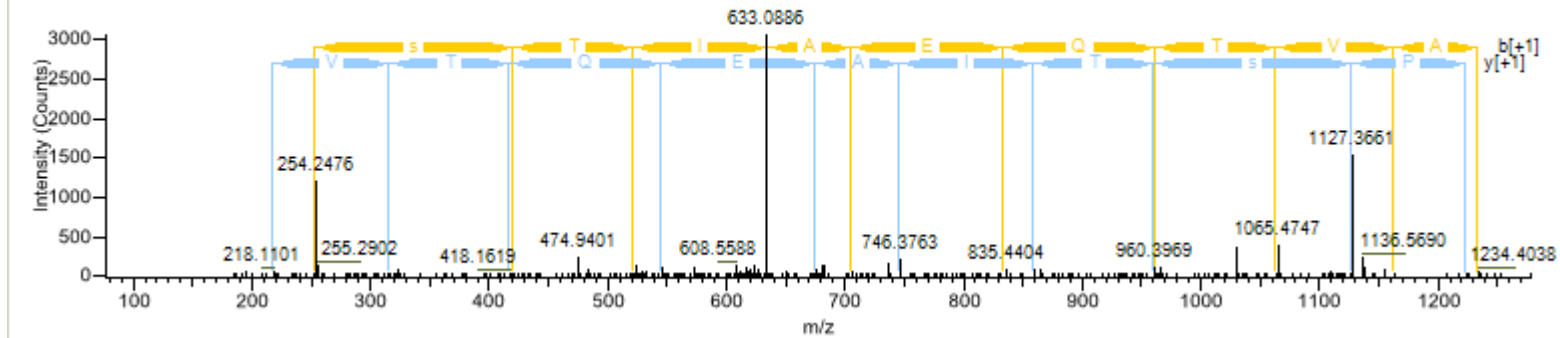

R[P]s[T]I[A]E[Q]T[V]A]K

|        | (NH <sub>3</sub> <sup>+</sup> )-R | P/s           | s/T          | T/I          | I/A          | A/E          | E/Q          | Q/T          | T/V           |
|--------|-----------------------------------|---------------|--------------|--------------|--------------|--------------|--------------|--------------|---------------|
| b (+1) | 157.1                             | <b>254.2</b>  | <b>421.2</b> | <b>522.2</b> | <b>635.3</b> | <b>706.3</b> | <b>835.4</b> | <b>963.4</b> | <b>1064.5</b> |
| y (+1) | <b>1224.6</b>                     | <b>1127.5</b> | <b>960.5</b> | <b>859.5</b> | <b>746.4</b> | <b>675.4</b> | <b>546.3</b> | <b>418.3</b> | <b>317.2</b>  |
|        | V/A                               | A/K           | K-(COOH)     |              |              |              |              |              |               |
| b (+1) | <b>1163.5</b>                     | <b>1234.6</b> | 1362.7       |              |              |              |              |              |               |
| y (+1) | <b>218.1</b>                      | 147.1         | 1380.7       |              |              |              |              |              |               |

C: [related to Fig 1B (Line3)]: OrbiTrap MS2 data for m/z 909.9 2<sup>+</sup> :[M+H] = 1818.84  
 SIK2 (Glucagon treatment) AQTVGLPVTMHsPNMR [S379](#)

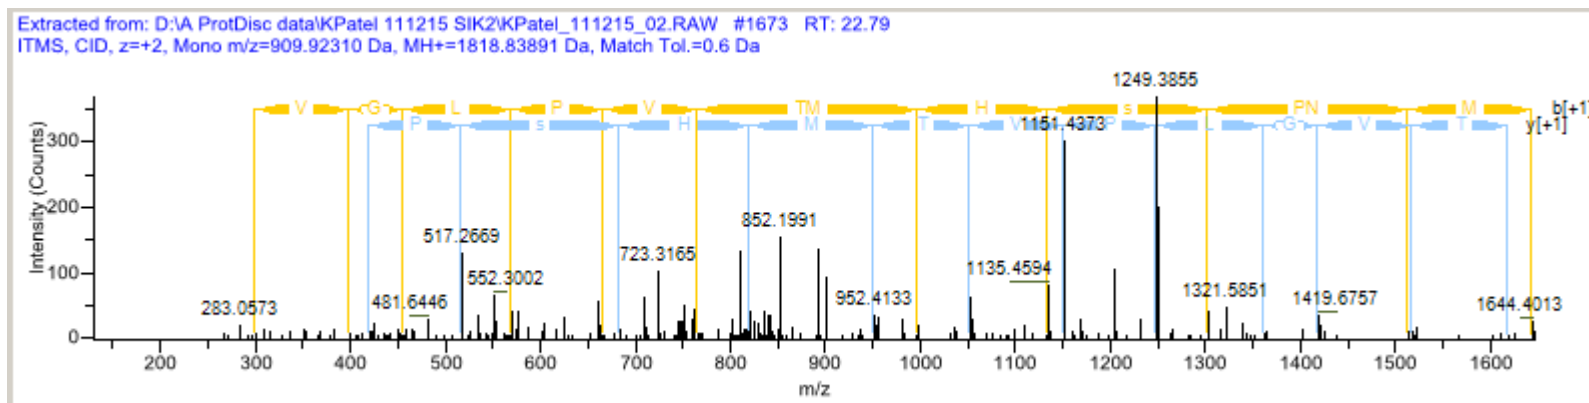

A Q T V G L P V T M H s P N M R

|        | (NH <sub>3</sub> <sup>+</sup> )-A | Q/T           | T/V           | V/G           | G/L           | L/P           | P/V           | V/T           | T/M          |
|--------|-----------------------------------|---------------|---------------|---------------|---------------|---------------|---------------|---------------|--------------|
| b (+1) | 72.0                              | 200.1         | <b>301.2</b>  | <b>400.2</b>  | <b>457.2</b>  | <b>570.3</b>  | <b>667.4</b>  | <b>766.4</b>  | 867.5        |
| y (+1) | 1747.8                            | 1619.7        | <b>1518.7</b> | <b>1419.6</b> | <b>1362.6</b> | <b>1249.5</b> | <b>1152.5</b> | <b>1053.4</b> | <b>952.4</b> |
|        | M/H                               | H/s           | s/P           | P/N           | N/M           | M/R           | R-(COOH)      |               |              |
| b (+1) | <b>998.5</b>                      | <b>1135.6</b> | <b>1302.6</b> | 1399.6        | <b>1513.7</b> | <b>1644.7</b> | 1800.8        |               |              |
| y (+1) | <b>821.3</b>                      | <b>684.3</b>  | <b>517.3</b>  | <b>420.2</b>  | 306.2         | 175.1         | 1818.8        |               |              |

**D: [related to Fig 1B (Line4)]: OrbiTrap MS2 data for m/z 1059.0 2<sup>+</sup> :[M+H] = 2117.05  
 SIK2 (Glucagon treatment) RHtLSEVTNQLVVMPGAGK [T484](#)**

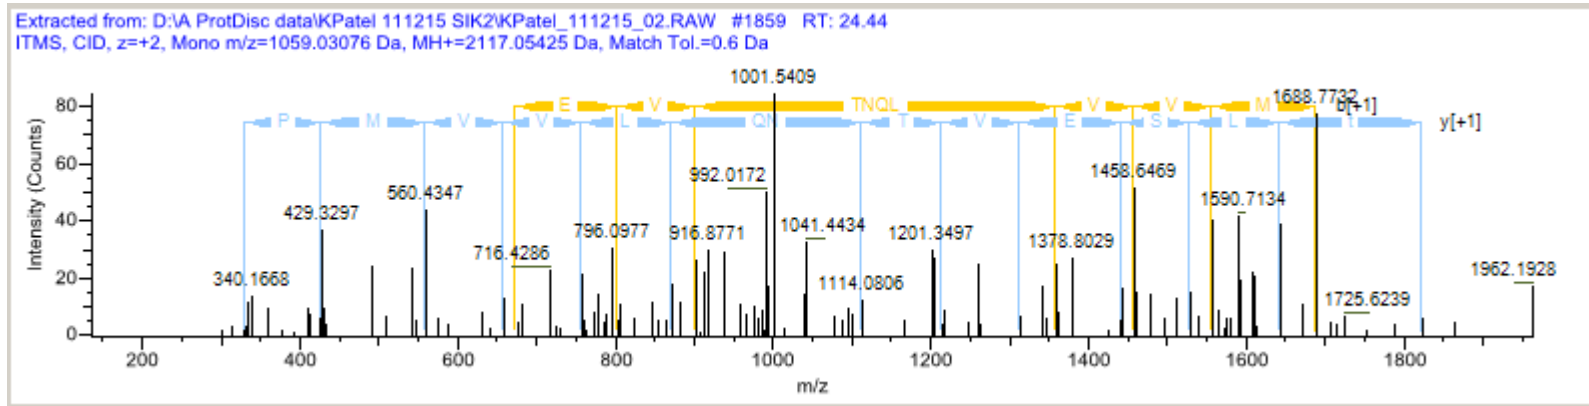

R H **t** L S E V T N Q L V V M P G A G K

|        | (NH <sub>3</sub> <sup>+</sup> )-R | H/t            | t/L           | L/S           | S/E           | E/V            | V/T           | T/N           | N/Q    |
|--------|-----------------------------------|----------------|---------------|---------------|---------------|----------------|---------------|---------------|--------|
| b (+1) | 157.1                             | 294.2          | 475.2         | 588.3         | <b>675.3</b>  | <b>804.3</b>   | <b>903.4</b>  | 1004.5        | 1118.5 |
| y (+1) | 1961.0                            | <b>1823.97</b> | <b>1642.9</b> | <b>1529.8</b> | <b>1442.8</b> | <b>1313.76</b> | <b>1214.7</b> | <b>1113.6</b> | 999.6  |

|        | Q/L          | L/V           | V/V           | V/M           | M/P           | P/G          | G/A    | A/G    | G/K    |
|--------|--------------|---------------|---------------|---------------|---------------|--------------|--------|--------|--------|
| b (+1) | 1246.6       | <b>1359.6</b> | <b>1458.7</b> | <b>1557.8</b> | <b>1688.8</b> | 1785.9       | 1842.9 | 1913.9 | 1971.0 |
| y (+1) | <b>871.5</b> | <b>758.4</b>  | <b>659.4</b>  | <b>560.3</b>  | <b>429.2</b>  | <b>332.2</b> | 275.2  | 204.1  | 147.1  |

|        | K-(COOH) |
|--------|----------|
| b (+1) | 2099.0   |
| y (+1) | 2117.1   |

**E: [related to Fig 1B (Line4)]: OrbiTrap MS2 data for m/z 711.7 3<sup>+</sup>: [M+H] = 2133.05  
 SIK2 (Glucagon treatment) RHTLsEVTNQLVVmPGAGK [S486](#)**

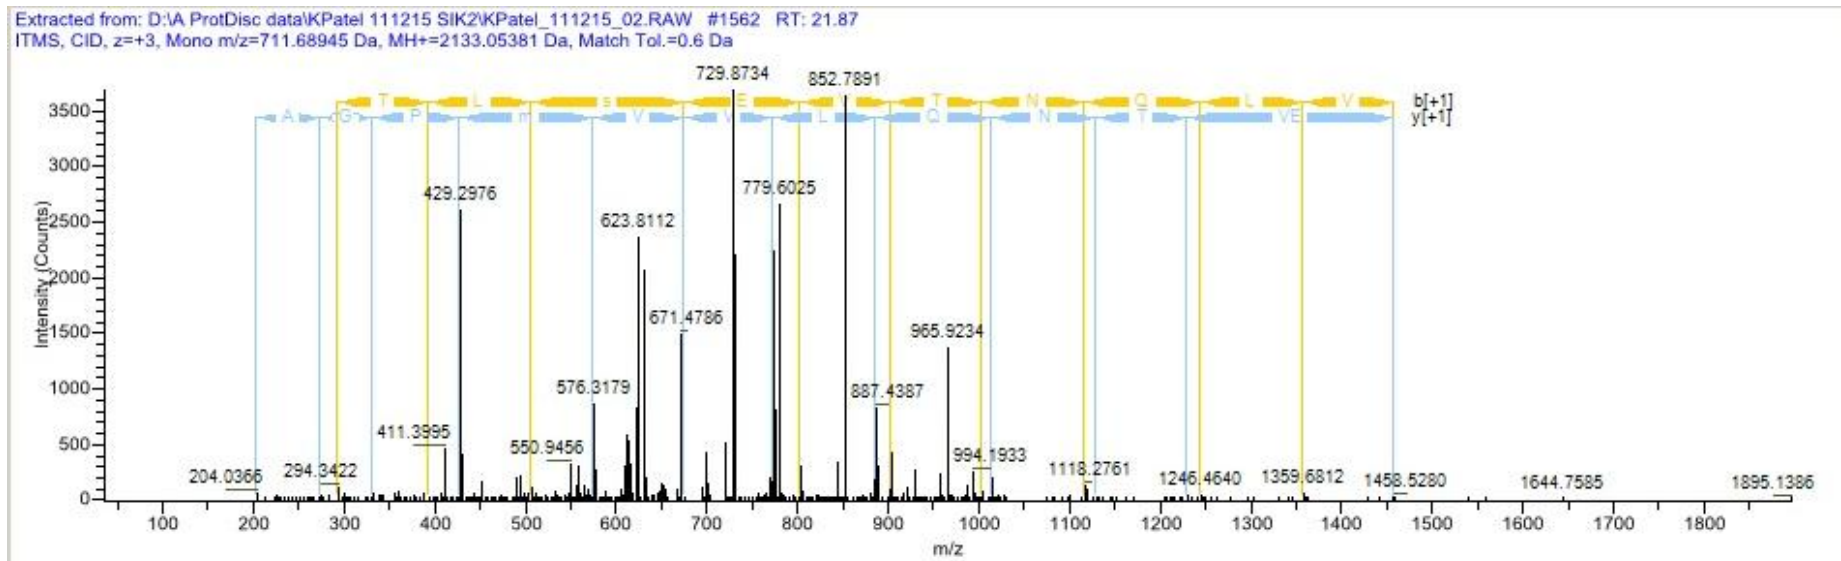

**R H T L s E V T N Q L V V m P G A G K**

|        | (NH <sub>3</sub> <sup>+</sup> )-R | H/T          | T/L          | L/s          | s/E           | E/V          | V/T           | T/N           | N/Q           |
|--------|-----------------------------------|--------------|--------------|--------------|---------------|--------------|---------------|---------------|---------------|
| b (+1) | 157.1                             | <b>294.1</b> | <b>395.2</b> | <b>508.3</b> | <b>675.3</b>  | <b>804.3</b> | <b>903.4</b>  | <b>1004.5</b> | <b>1118.5</b> |
| y (+1) | 1977.0                            | 1839.9       | 1738.8       | 1625.8       | <b>1458.8</b> | 1329.7       | <b>1230.7</b> | <b>1129.6</b> | <b>1015.6</b> |

|        | Q/L           | L/V           | V/V          | V/M          | M/P          | P/G          | G/A          | A/G          | G/K    |
|--------|---------------|---------------|--------------|--------------|--------------|--------------|--------------|--------------|--------|
| b (+1) | <b>1246.6</b> | <b>1359.6</b> | 1458.7       | 1557.8       | 1704.8       | 1801.9       | 1858.9       | 1929.9       | 1986.9 |
| y (+1) | <b>887.5</b>  | <b>774.4</b>  | <b>675.3</b> | <b>576.3</b> | <b>429.2</b> | <b>332.2</b> | <b>275.2</b> | <b>204.1</b> | 147.1  |

K-(COOH)  
 b (+1) 2115.0

**F: [related to Fig 1B (Line5)]: OrbiTrap MS2 data for m/z 851.4 2<sup>+</sup> :[M+H] = 1701.83  
 SIK2 (Glucagon treatment) RAsDTSLTQGIVAFR [S587](#)**

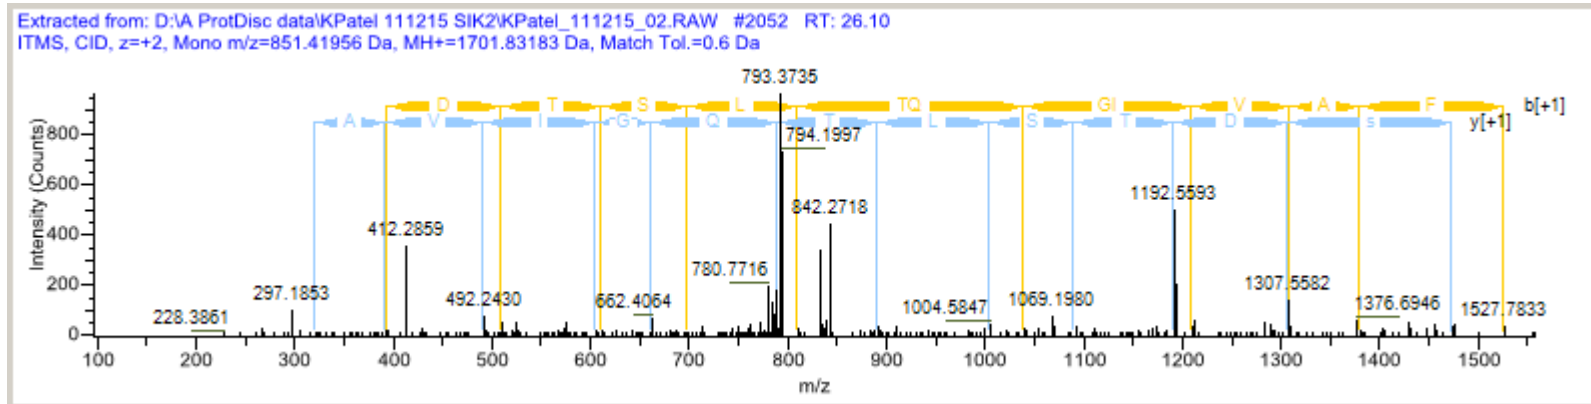

R A[s] D] T] S] L] T] Q] G] I] V] A] F] R

|        | (NH <sub>3</sub> ) <sup>+</sup> -R | A/s           | s/D           | D/T           | T/S           | S/L           | L/T          | T/Q          | Q/G           |
|--------|------------------------------------|---------------|---------------|---------------|---------------|---------------|--------------|--------------|---------------|
| b (+1) | 157.1                              | <b>228.14</b> | <b>395.1</b>  | <b>510.2</b>  | <b>611.2</b>  | <b>698.3</b>  | <b>811.3</b> | 912.4        | <b>1040.4</b> |
| y (+1) | <b>1545.7</b>                      | <b>1474.7</b> | <b>1307.7</b> | <b>1192.7</b> | <b>1091.6</b> | <b>1004.6</b> | <b>891.5</b> | <b>790.5</b> | <b>662.4</b>  |
|        | G/I                                | I/V           | V/A           | A/F           | F/R           | R-(COOH)      |              |              |               |
| b (+1) | 1097.5                             | <b>1210.5</b> | <b>1309.6</b> | <b>1380.7</b> | <b>1527.7</b> | 1683.8        |              |              |               |
| y (+1) | <b>605.4</b>                       | <b>492.3</b>  | <b>393.2</b>  | <b>322.2</b>  | 175.1         | 1701.8        |              |              |               |

**Supplementary Figure 1: Annotated MS2 spectra for SIK2 phosphopeptides listed in Figure 1B.**

Figures of the spectra from Orbitrap LC-MS-MS analyses were derived from Proteome Discoverer software (Thermo) and that from QTrap LC-MS-MS analysis was derived from Mascot software (www.matrixscience.com). Ions marked in bold in the tables are those detected in the spectra. Phosphorylation sites are indicated by lower case (e.g. s, t).

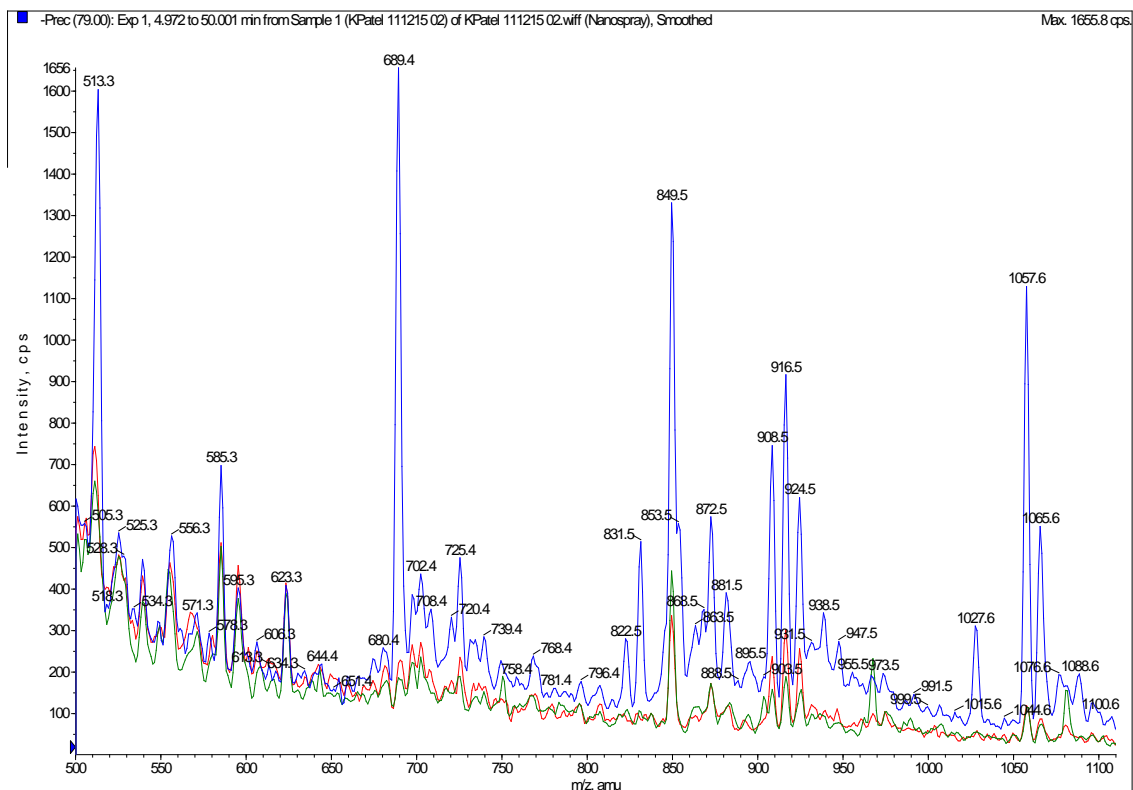

### Supplementary Figure 2: Precursor ion scanning (-79Da) of SIK2 tryptic digests

SIK2 immunoprecipitated samples from control (Green), glucagon-treated (Blue) and insulin-treated (Red) cells were trypsin-digested and analyzed by precursor ion scanning (-79Da). Phosphopeptides and their approximate relative abundances were identified by LC-MS-MS mass spectrometry on an Applied Biosystems 4000 QTrap coupled to a Dionex Ultimate 3000 liquid chromatography system. The MS was set up to use a precursor ion scan of  $m/z$  -79 in negative ion mode followed by an ion trap high resolution and a high sensitivity MS-MS scan in positive mode. Intensity of (-79) signal is plotted against  $m/z$  (for negative mode Average mass). Peaks that increase on glucagon treatment are 513.3 (SsFPVEQR, S343); 689.4 (RPsTIAEQTVAK, S358); 849.5 (RAsDTSLTQGIVAFR, S587); 908.5, 916.5, 924.5 (AQTVGLPVTMHsPNMR, S379, where the triplet of peaks is caused by methionine oxidation) and 1057.6 (RHtLSEVTNQLVVMGAGK, T484).



#1

```
1 MVMADGPRHL QRGVVRVGFY DIEGTLGKGN FAVVKLGRHR ITKTEVAIKI
51 IDKSQLDAVN LEKIYREVQI MKMLDHPHII KLYQVMETKS MLYLVTEYAK
101 NGEIFDYLAN HGRLNESEAR RKFQWILSAV DYCHGRKIVH RDLKAENLLL
151 DNNMNIKIAD FGFNFFFKSG ELLATWCGSP PYAAPEVFEG QQYEGPQLDI
201 WSMGVVLYVL VCGALPFDGP TLPILRQRVL EGRFRIPYFM SEDCEHLIRR
251 MLVLDPSKRL TIAQIKEHKW MLIEVPVQRP VLYPQEQENE PSIGEFNEQV
301 LRLMHS LGID QQKTIESLQN KSYNHFAAIY FLLVERLKSH RSSFVPEQRL
351 DGRQRRPSTI AEQTVAKAQT VGLPVTMHSP NMRLLR SALL PQASNVEAFS
401 FPASGCQAEA AFMEEECVDT PKVNGCLLDP VPPVLRKGC QSLPSNMMET
451 SIDEGLETEG EAEEDPAHAF EAFQSTRSGQ RRHTLSEVTN QLVVMPGAGK
501 IFSMNDSPSL DSV DSEYDMG SVQRDLNFLE DNPSLKDIML ANQPSPRM TS
551 PFISLRPTNP AMQALSSQKR EVHNRSPVSF REGRRASDTS LTQGIVAFRQ
601 HLQNLARTKG ILELNKVQLL YEQIGPEADP NLAPAAPQLQ DLASSCPQEE
651 VSQQQESVST LPASVHPQLS PRQSLETQYL QHRLQKPSLL SKAQN TCQLY
701 CKEPPRSLEQ QLQEHR LQQK RLFLQKQSQL QAYFNQM QIA ESSYPQPSQQ
751 LPLPRQETPP PSQQAPPFSL TQPLSPVLEP SSEQM QYSPF LSQYQEMQLQ
801 PLPSTSGPRA APPLPTQLQQ QQQPPPPPPP PPRQPGAAPA PLQFSYQTCE
851 LPSAASPAPD YPTPCQYFVD GAQQSDLTGP DCPRSPGLQE APSSYDPLAL
901 SELPGLFDCE MLDAVDPQHN GYVLVN
```

#2

```
1 MVMADGPRHL QRGVVRVGFY DIEGTLGKGN FAVVKLGRHR ITKTEVAIKI
51 IDKSQLDAVN LEKIYREVQI MKMLDHPHII KLYQVMETKS MLYLVTEYAK
101 NGEIFDYLAN HGRLNESEAR RKFQWILSAV DYCHGRKIVH RDLKAENLLL
151 DNNMNIKIAD FGFNFFFKSG ELLATWCGSP PYAAPEVFEG QQYEGPQLDI
201 WSMGVVLYVL VCGALPFDGP TLPILRQRVL EGRFRIPYFM SEDCEHLIRR
251 MLVLDPSKRL TIAQIKEHKW MLIEVPVQRP VLYPQEQENE PSIGEFNEQV
301 LRLMHS LGID QQKTIESLQN KSYNHFAAIY FLLVERLKSH RSSFVPEQRL
351 DGRQRRPSTI AEQTVAKAQT VGLPVTMHSP NMRLLR SALL PQASNVEAFS
401 FPASGCQAEA AFMEEECVDT PKVNGCLLDP VPPVLRKGC QSLPSNMMET
451 SIDEGLETEG EAEEDPAHAF EAFQSTRSGQ RRHTLSEVTN QLVVMPGAGK
501 IFSMNDSPSL DSV DSEYDMG SVQRDLNFLE DNPSLKDIML ANQPSPRM TS
551 PFISLRPTNP AMQALSSQKR EVHNRSPVSF REGRRASDTS LTQGIVAFRQ
601 HLQNLARTKG ILELNKVQLL YEQIGPEADP NLAPAAPQLQ DLASSCPQEE
651 VSQQQESVST LPASVHPQLS PRQSLETQYL QHRLQKPSLL SKAQN TCQLY
701 CKEPPRSLEQ QLQEHR LQQK RLFLQKQSQL QAYFNQM QIA ESSYPQPSQQ
751 LPLPRQETPP PSQQAPPFSL TQPLSPVLEP SSEQM QYSPF LSQYQEMQLQ
801 PLPSTSGPRA APPLPTQLQQ QQQPPPPPPP PPRQPGAAPA PLQFSYQTCE
851 LPSAASPAPD YPTPCQYFVD GAQQSDLTGP DCPRSPGLQE APSSYDPLAL
901 SELPGLFDCE MLDAVDPQHN GYVLVN
```

#3

```
1 MVMADGPRHL QRGVVRVGFY DIEGTLGKGN FAVVKLGRHR ITKTEVAIKI
51 IDKSQLDAVN LEKIYREVQI MKMLDHPHII KLYQVMETKS MLYLVTEYAK
101 NGEIFDYLAN HGRLNESEAR RKFQWILSAV DYCHGRKIVH RDLKAENLLL
151 DNNMNIKIAD FGFNFFFKSG ELLATWCGSP PYAAPEVFEG QQYEGPQLDI
201 WSMGVVLYVL VCGALPFDGP TLPILRQRVL EGRFRIPYFM SEDCEHLIRR
251 MLVLDPSKRL TIAQIKEHKW MLIEVPVQRP VLYPQEQENE PSIGEFNEQV
301 LRLMHS LGID QQKTIESLQN KSYNHFAAIY FLLVERLKSH RSSFVPEQRL
351 DGRQRRPSTI AEQTVAKAQT VGLPVTMHSP NMRLLR SALL PQASNVEAFS
401 FPASGCQAEA AFMEEECVDT PKVNGCLLDP VPPVLRKGC QSLPSNMMET
451 SIDEGLETEG EAEEDPAHAF EAFQSTRSGQ RRHTLSEVTN QLVVMPGAGK
501 IFSMNDSPSL DSV DSEYDMG SVQRDLNFLE DNPSLKDIML ANQPSPRM TS
551 PFISLRPTNP AMQALSSQKR EVHNRSPVSF REGRRASDTS LTQGIVAFRQ
601 HLQNLARTKG ILELNKVQLL YEQIGPEADP NLAPAAPQLQ DLASSCPQEE
651 VSQQQESVST LPASVHPQLS PRQSLETQYL QHRLQKPSLL SKAQN TCQLY
701 CKEPPRSLEQ QLQEHR LQQK RLFLQKQSQL QAYFNQM QIA ESSYPQPSQQ
751 LPLPRQETPP PSQQAPPFSL TQPLSPVLEP SSEQM QYSPF LSQYQEMQLQ
801 PLPSTSGPRA APPLPTQLQQ QQQPPPPPPP PPRQPGAAPA PLQFSYQTCE
851 LPSAASPAPD YPTPCQYFVD GAQQSDLTGP DCPRSPGLQE APSSYDPLAL
901 SELPGLFDCE MLDAVDPQHN GYVLVN
```

**Supplementary Figure 3: Sequence coverage of HA-SIK2 in phosphopeptide mapping by LC-MS-MS.** The sequence that was covered in Orbitrap LC-MS-MS analysis by peptides with Mascot scores indicating identity or extensive homology, ( $p < 0.05$ ; score  $> 30$  for (#1) and (#3) and  $> 31$  for (#2)) is highlighted in bold and red (searches performed against SwissProt/Human database). Sequence coverage of HA-SIK2 was 79% from both unstimulated cells (#1), and glucagon-treated cells (#2) and 80% from insulin-treated cells (#3).

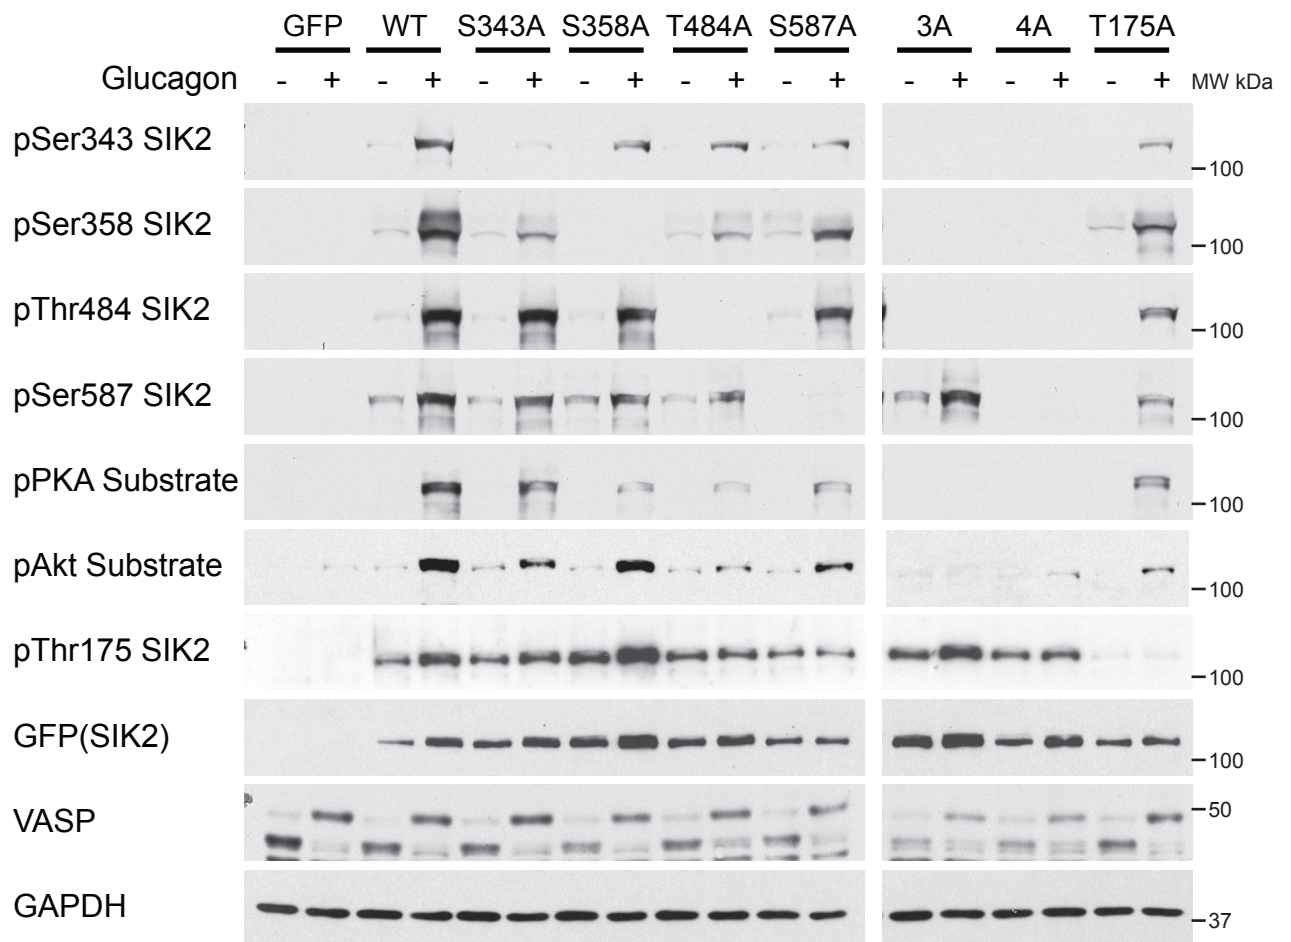

**Supplementary Figure 4: Characterization of SIK2 phospho-specific antibodies**

Primary mouse hepatocytes (from 8-12 week-old male C57BL/6 mice) were infected with (1:2 MOI) adenoviral vectors encoding GFP-SIK2 wild-type or the indicated SIK2 phosphorylation-site mutants including 3A (S343A, S358A and T484A together), 4A mutant (3A and S587A together) and the kinase-inactive T-loop mutant T175A. Primary hepatocytes infected with GFP alone were included as a control. After 16 h the hepatocytes were stimulated for 10 min with 0.1  $\mu$ M glucagon prior to cell lysis. The lysates were subjected to immunoblotting with the indicated phospho-specific SIK2 antibodies, with a phospho-PKA substrate motif antibody, with a VASP antibody to confirm the PKA activation by glucagon and with a GAPDH antibody as a loading control. Lysates were also immunoblotted with a phospho-Akt substrate motif antibody to compare the relative site selectivity with the phospho-PKA substrate motif antibody.

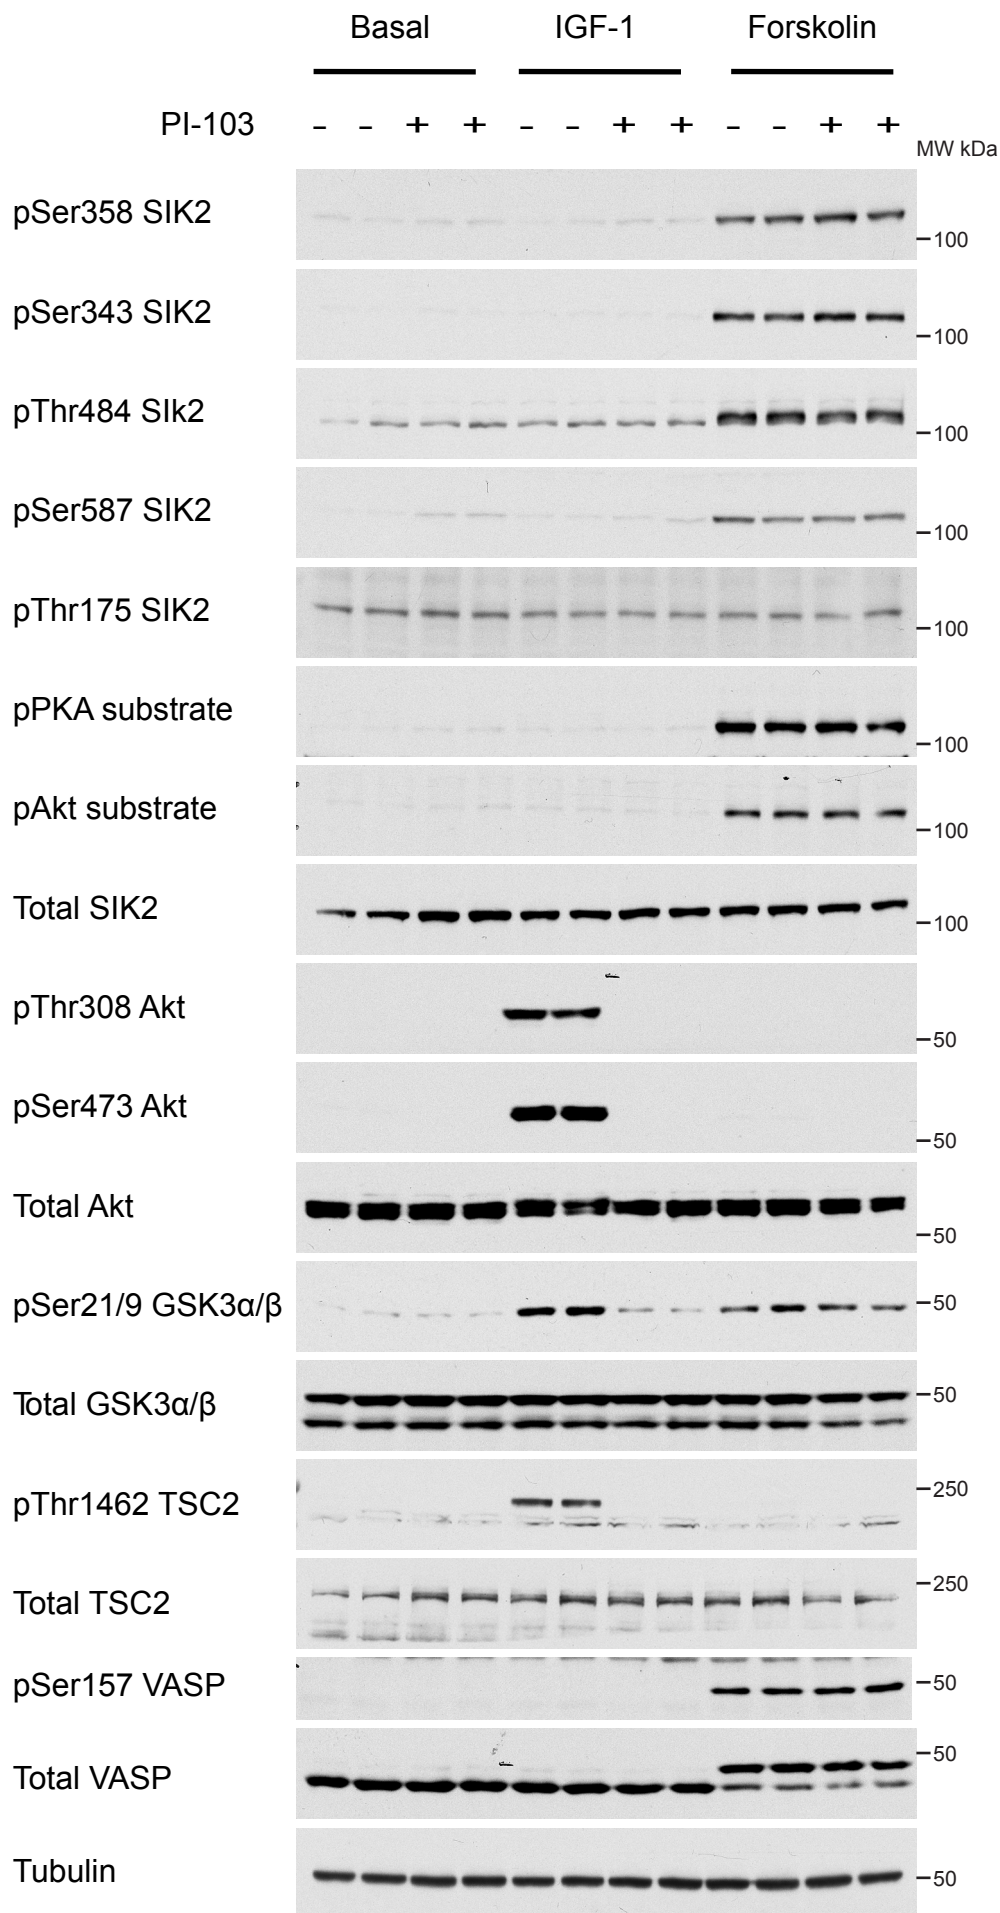

**Supplementary Figure 5: Forskolin but not IGF-1 increases recombinant SIK2 phosphorylation**  
 HA-SIK2 was ectopically expressed in HEK293 cells for 36 h followed by pre-treatment with the PI3K inhibitor PI-103 (1  $\mu$ M for 30 min) and subsequently stimulated with 10  $\mu$ M forskolin or 50 ng/ml IGF-1 prior to cell lysis. Lysates were immunoblotted with indicated antibodies. The pAkt, pGSK3 $\alpha/\beta$  and pTSC2 antibodies were used to confirm the effects of IGF-1 and the inhibitor (PI-103) and VASP antibodies were used to confirm PKA activation by forskolin. The tubulin antibody was used as a loading control.

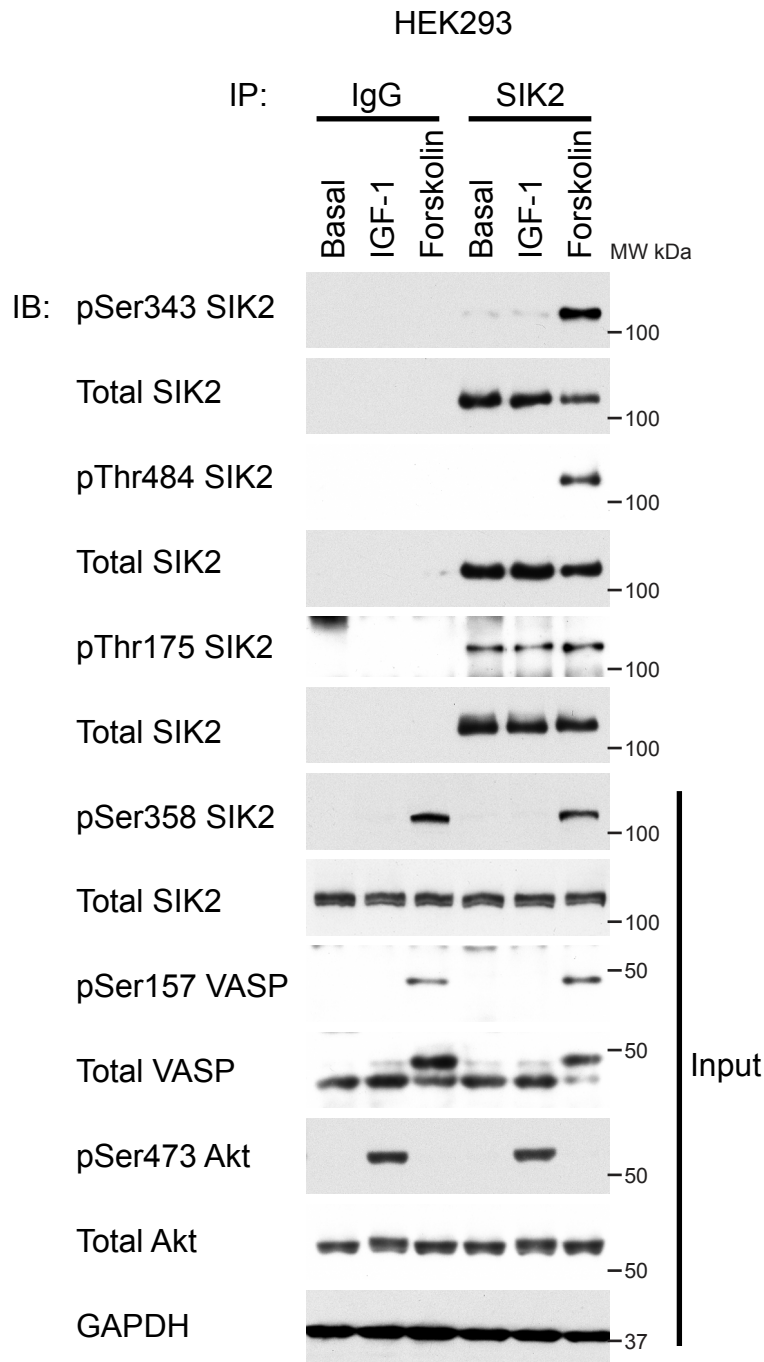

**Supplementary Figure 6: Forskolin but not IGF-1 increases endogenous SIK2 phosphorylation**

HEK293 cells were lysed following a 10-min treatment with 10  $\mu$ M forskolin or 50 ng/ml IGF-1. Endogenous SIK2 was immunoprecipitated from 0.5 mg lysates (pre-immune IgG as a negative control). The precipitates were immunoblotted (along with 40  $\mu$ g of lysates for input comparison) with the indicated SIK2 antibodies. The pAkt and VASP antibodies were used to confirm the stimulation by IGF-1 and forskolin respectively. The GAPDH antibody was used as a loading control.



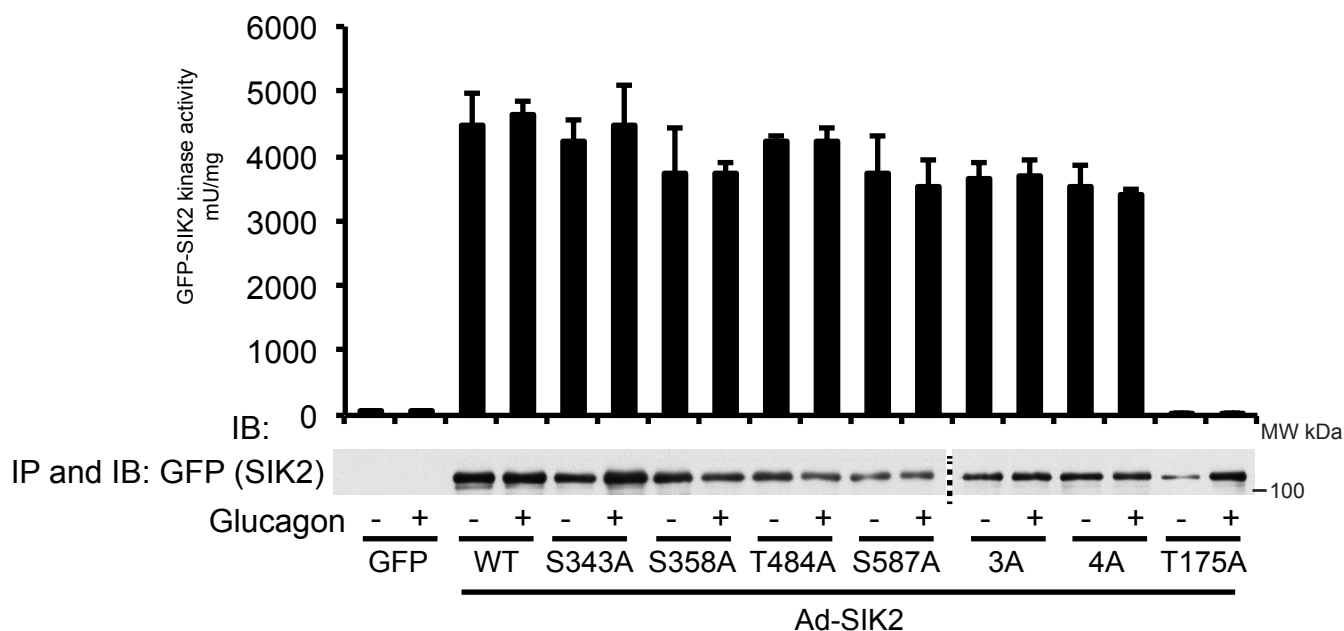

**Supplementary Figure 7: Activity of SIK2 wild-type and phospho-defective mutants**  
 GFP, GFP-SIK2 wild-type (WT) or the indicated GFP-SIK2 mutants were expressed in primary hepatocytes (from 8-12 week-old male C57BL/6 mice) using adenoviral vectors (1:2 MOI) for 16 h prior to 0.1  $\mu$ M glucagon treatment for 10 min. GFP-SIK2 was immunoprecipitated from 50  $\mu$ g of lysates with anti-GFP-agarose beads and subjected to either in vitro kinase assay or immunoblotting. The SIK2 3A recombinant protein included S343A, S358A and T484A mutations, while the 4A mutant had these mutations plus a S587A mutation. Data is presented as mean  $\pm$  SD, n=3.

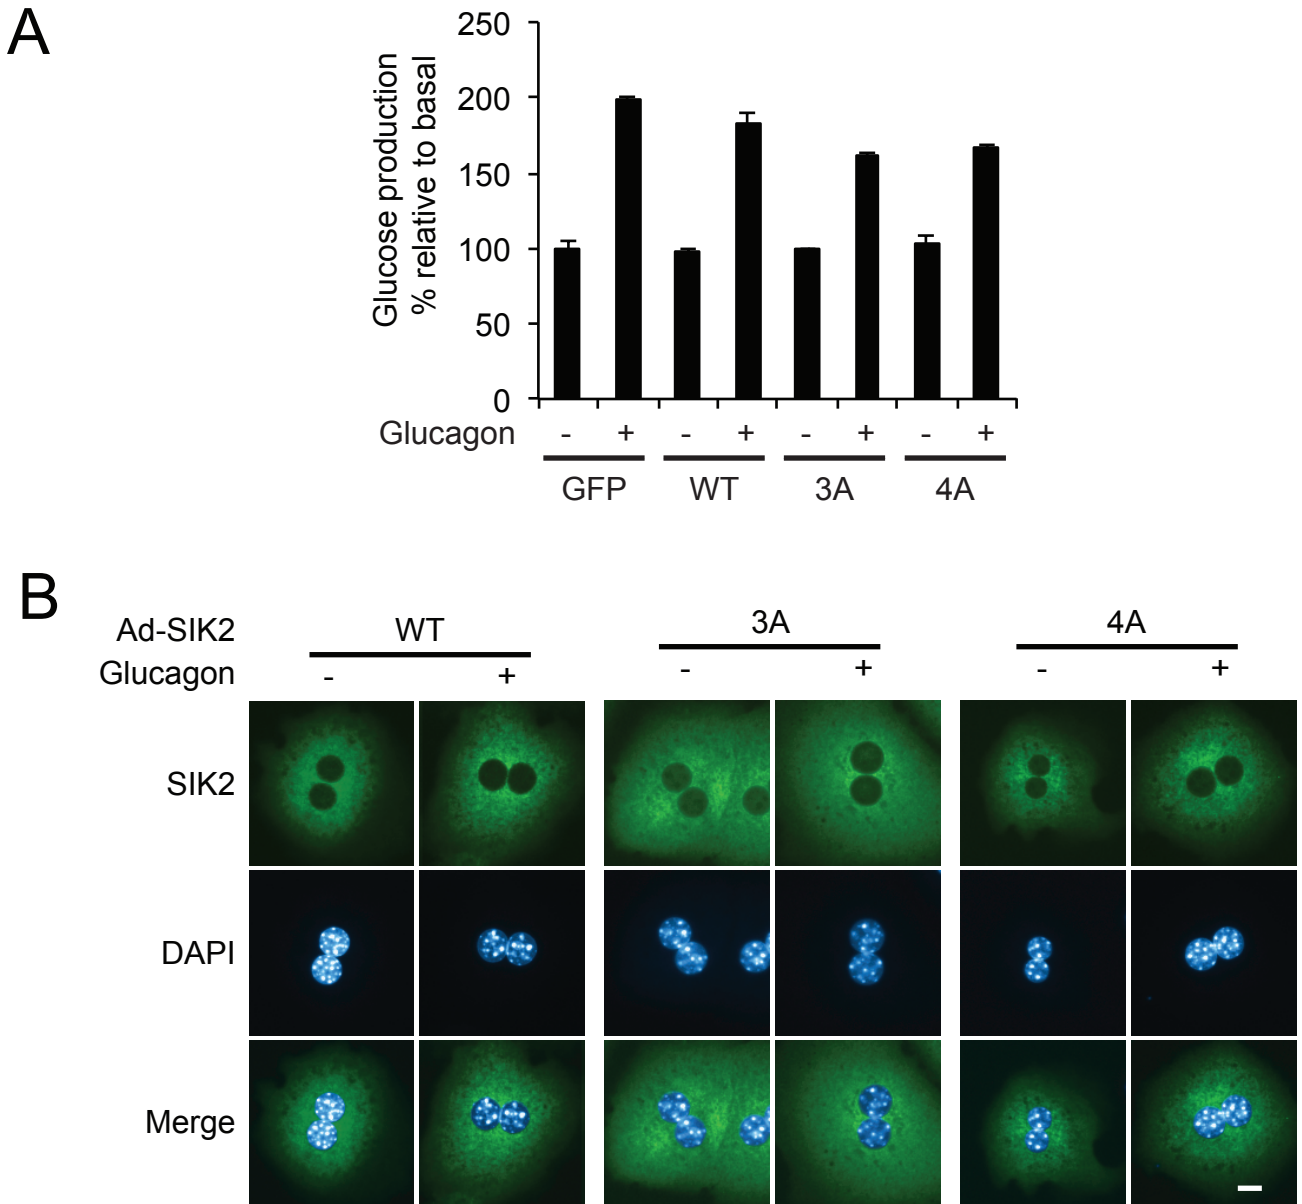

**Supplementary Figure 8: Cellular localization of the SIK2 wild-type and the mutants**

(A) Primary hepatocytes from 8-12 week-old male C57BL/6 mice were infected for total 20 h (1:1 MOI) with adenoviral vectors expressing GFP alone, GFP-SIK2 WT (WT), GFP-SIK2 3A (3A) or GFP-SIK2 4A (4A). The cells were treated for the last 8 h with 0.1  $\mu$ M glucagon and the cell culture medium was used to measure glucose production. Glucose production was normalized to total protein content and presented relative to hepatocytes without treatment in GFP infected cells. Data is presented as mean  $\pm$  SD, n=3. (B) Primary hepatocytes from 8-12 week-old male C57BL/6 mice were infected with the indicated SIK2 adenoviral constructs (Ad-GFP-SIK2) or GFP alone (MOI: 1:2) for 16 h followed by 0.1  $\mu$ M glucagon stimulation for 10 min. Subsequently cells were fixed with 3.7% paraformaldehyde and immunostained with anti-SIK2 to visualize SIK2, or DAPI to visualize the nuclei. Images were captured with a fluorescence microscope (Nikon Eclipse Ti) using Nikon NIS-Elements BR 3.1 software. Data is representative of three independent experiments. Scale bar is 10  $\mu$ m in length.

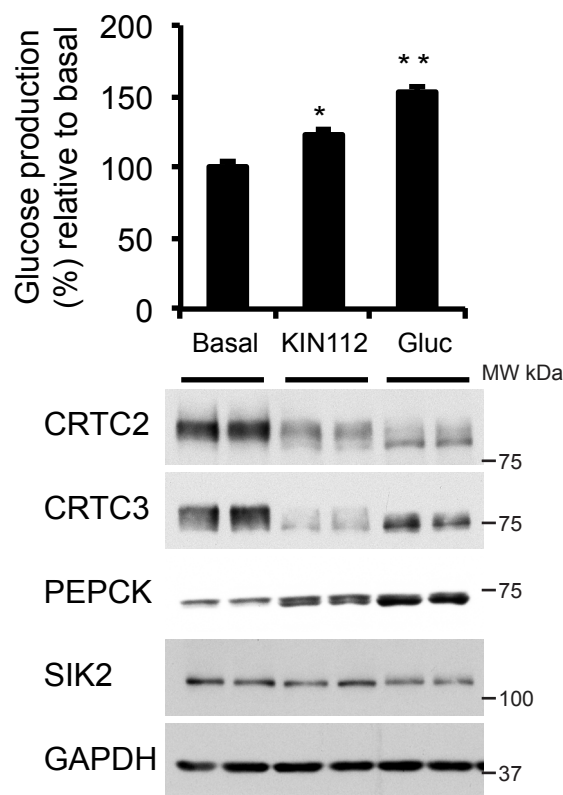

**Supplementary Figure 9: Effect of KIN112 on phosphorylation of CRTCs and hepatic gluconeogenesis**

Primary hepatocytes from 8-12 week-old male C57BL/6 mice were treated with 10  $\mu$ M KIN112 (SIK inhibitor) or 0.1  $\mu$ M glucagon (Gluc) for 12 h. Subsequently culture medium was used for measurement of glucose production (upper panel) while cells were lysed for immunoblotting (lower panels). Glucose production was normalized to total protein content and presented as a percentage of glucose production by hepatocytes without treatment (Basal). Lysates were immunoblotted with the indicated antibodies. Glucagon treatment was used as a positive control. Data is presented as mean  $\pm$  SD, n=3. \*p<0.01 basal versus KIN112, \*\*p<0.001 basal versus glucagon.

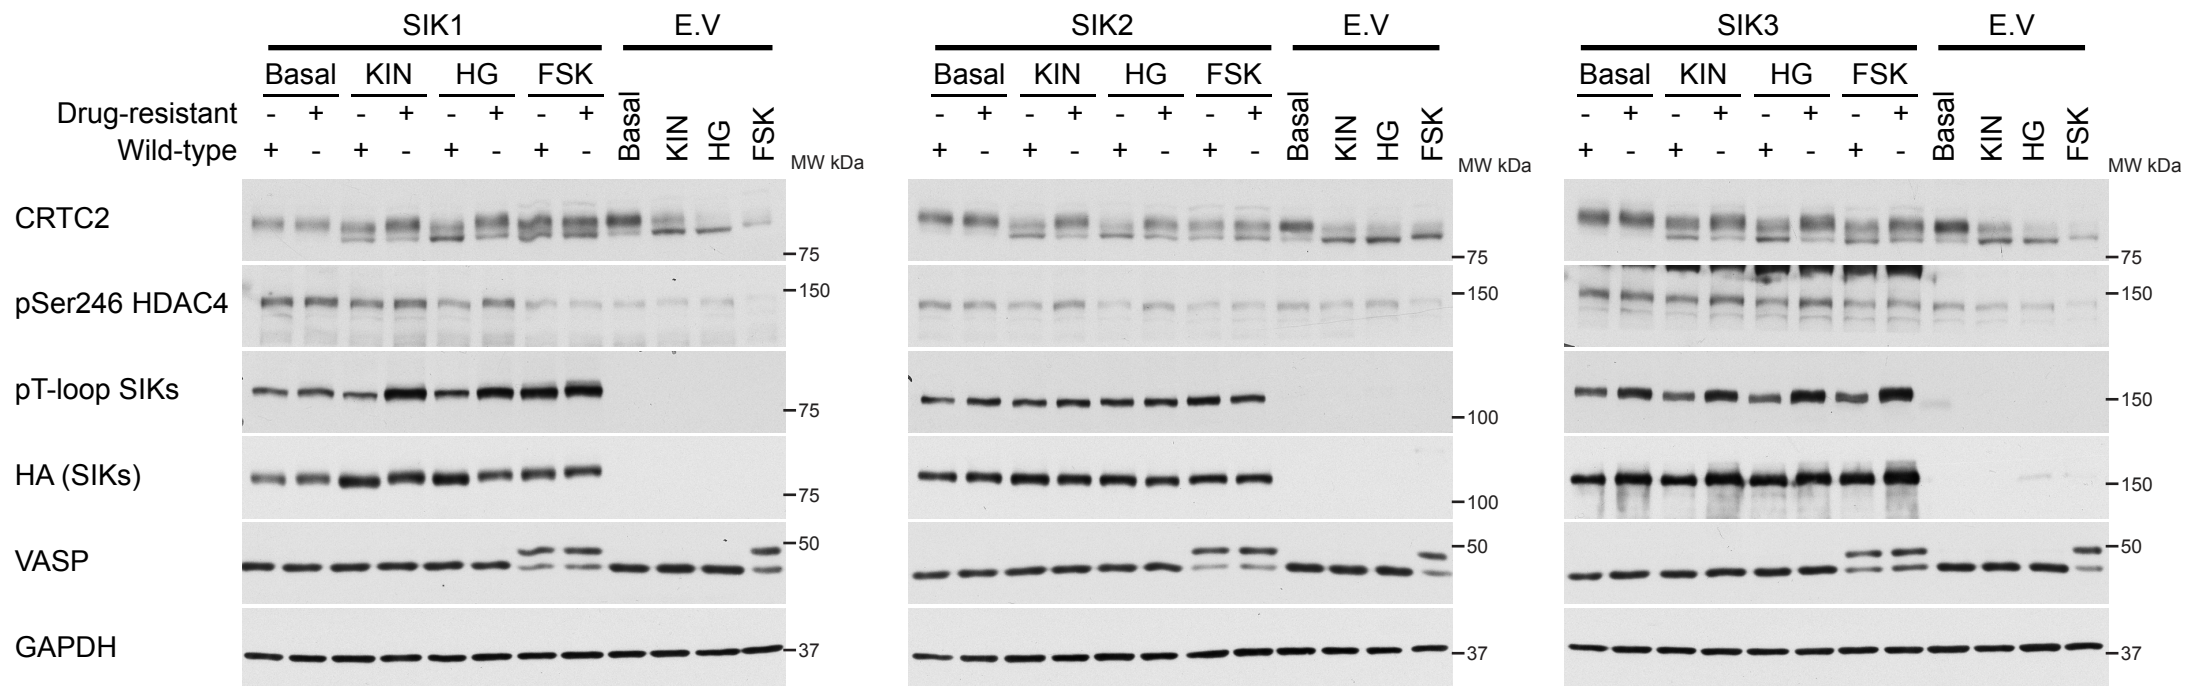

**Supplementary Figure 10: SIK-isoform drug-resistant mutants in HEK293 cells**

HA-empty-vector (E.V), HA-SIK wild-type or HA-SIK drug-resistant mutants (SIK1 T103Q, SIK2 T96Q and SIK3 T146Q) were expressed in HEK293 cells for 36 h followed by 1-h treatment with 10  $\mu$ M KIN112 (KIN) or 2  $\mu$ M HG-9-91-01 (HG) and 10 min stimulation with 10  $\mu$ M forskolin (FSK) (as a positive control) prior to cell lysis. Lysates were immunoblotted with the indicated antibodies. The pT-loop SIK antibody recognizes the phosphorylation of an equivalent residue on SIK1 (T182), SIK2 (T175) and SIK3 (T221). The VASP antibody was used to confirm PKA activation by FSK and the GAPDH antibody was used as a loading control.



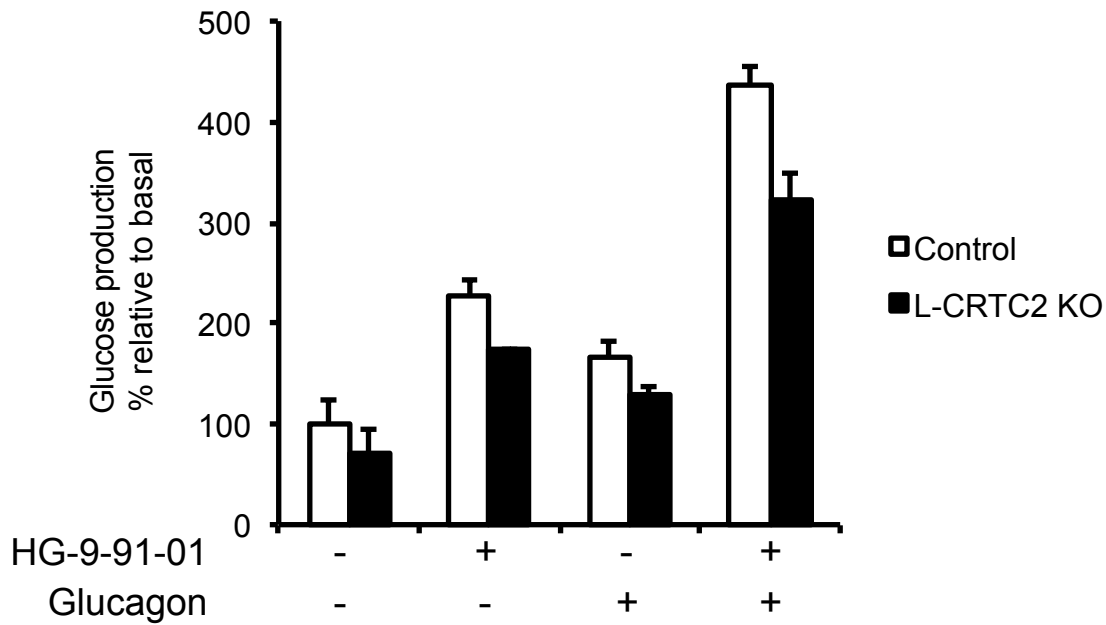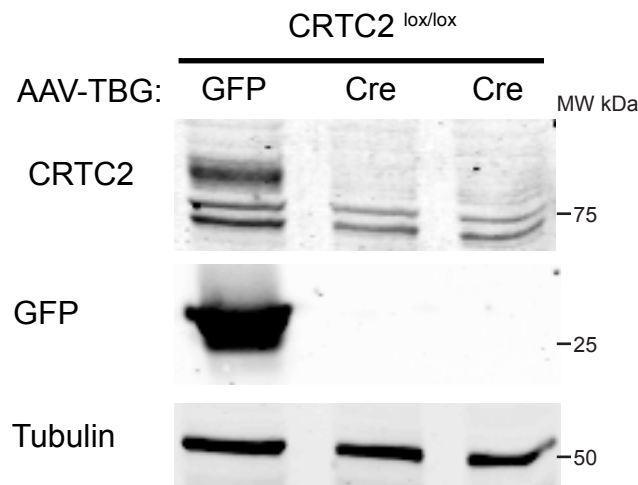

**Supplementary Figure 11: Effect of the SIK inhibitor (HG-9-91-01) in CRTC2-deficient hepatocytes**

(A) Glucose production from primary hepatocytes of control (CRTC2<sup>lox/lox</sup> + AAV-TBG-GFP) and liver-specific (L)-CRTC2 KO (CRTC2<sup>lox/lox</sup> + AAV-TBG-Cre) mice (8-12 week-old mice) 2 weeks following retro-orbital AAV injection was measured in response to 4  $\mu$ M HG-9-91-01 or 0.1  $\mu$ M glucagon treatment for 8 h. Glucose production was normalized to total protein content and presented as percentage of glucose production of control hepatocytes. (B) Lysates from the same experiment were immunoblotted with the indicated antibodies. Generation of CRTC2<sup>lox/lox</sup> mouse has been described previously<sup>1</sup>.

Supplementary Reference:

1. Le Lay J, Tuteja G, White P, Dhir R, Ahima R, Kaestner KH. CRTC2 (TORC2) contributes to the transcriptional response to fasting in the liver but is not required for the maintenance of glucose homeostasis. *Cell metabolism* **10**, 55-62 (2009).

Supplementary Figure 12: Original complete scans of the key immunoblots presented in the manuscript. Note that the data shown in manuscript is boxed. There are “cross outs” in some blots that are from the membranes stained with non-relevant antibodies exposed/scanned together with the membranes used for the manuscript.

Fig1C

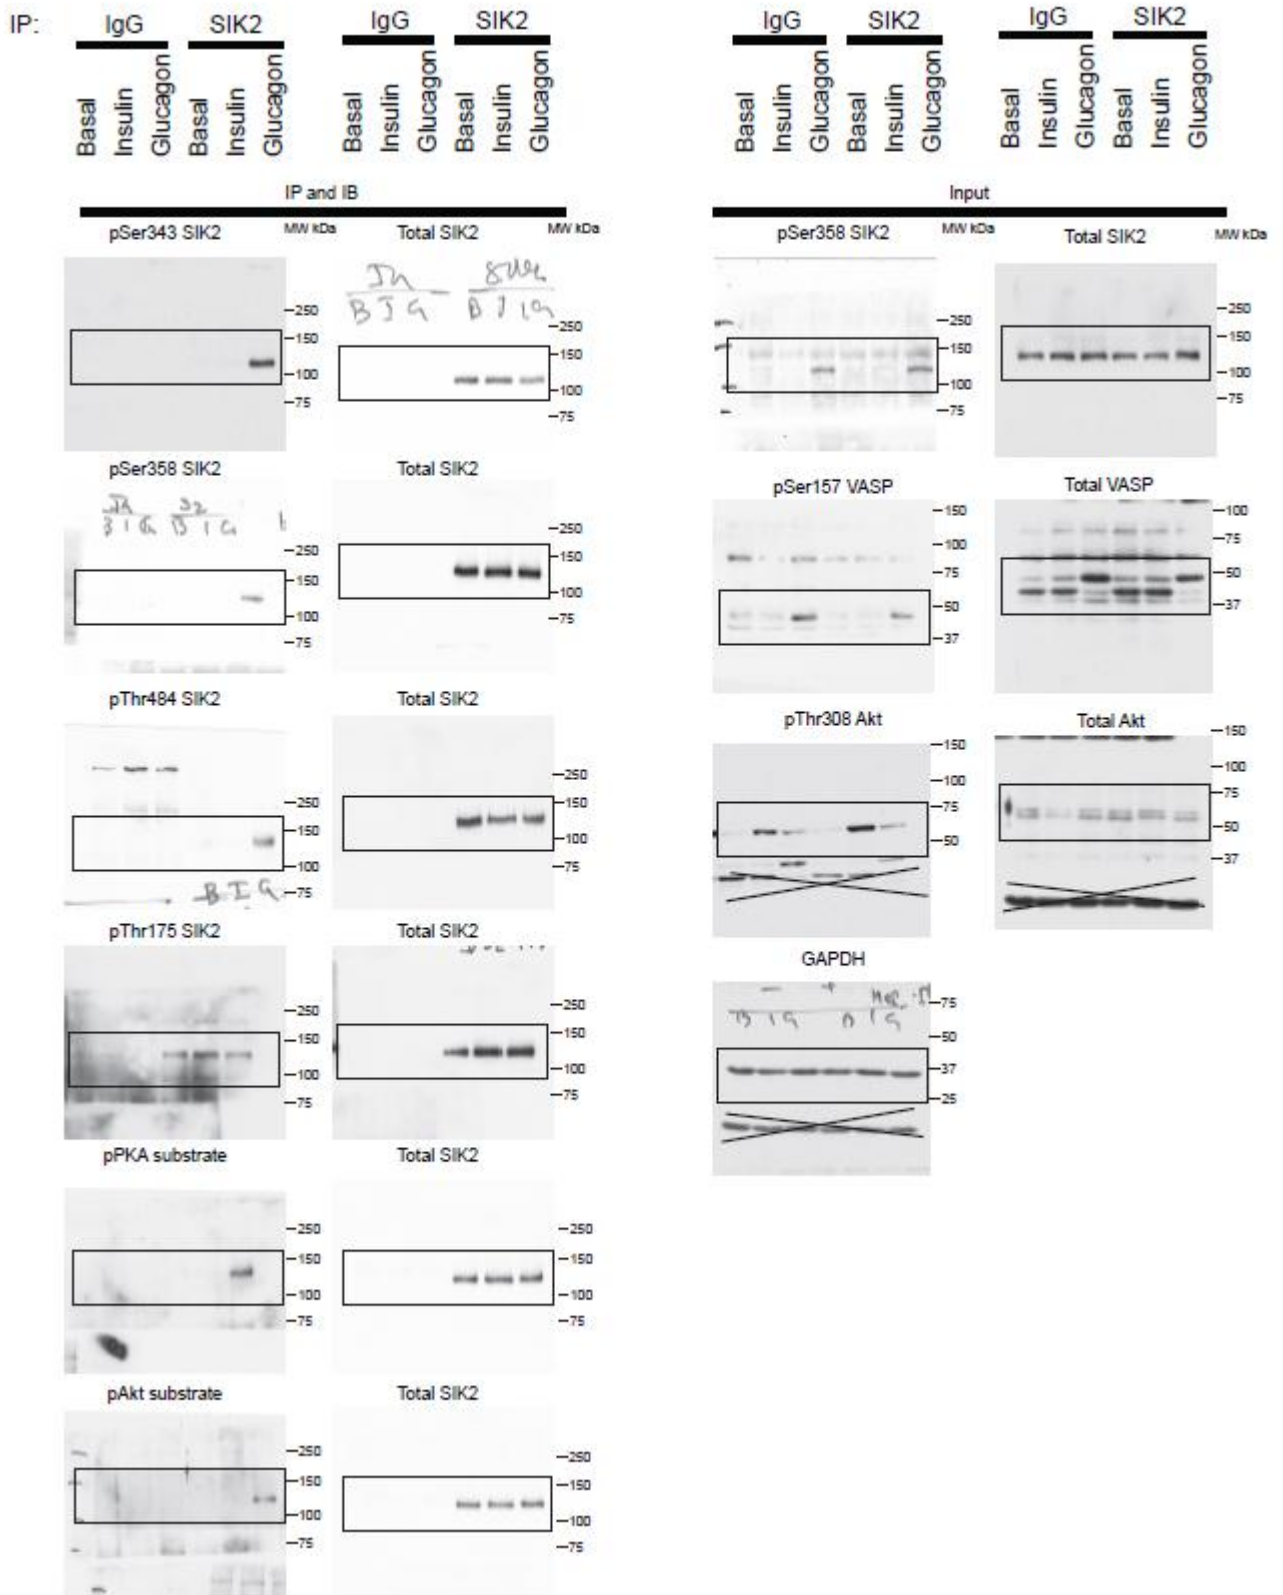



Fig2G

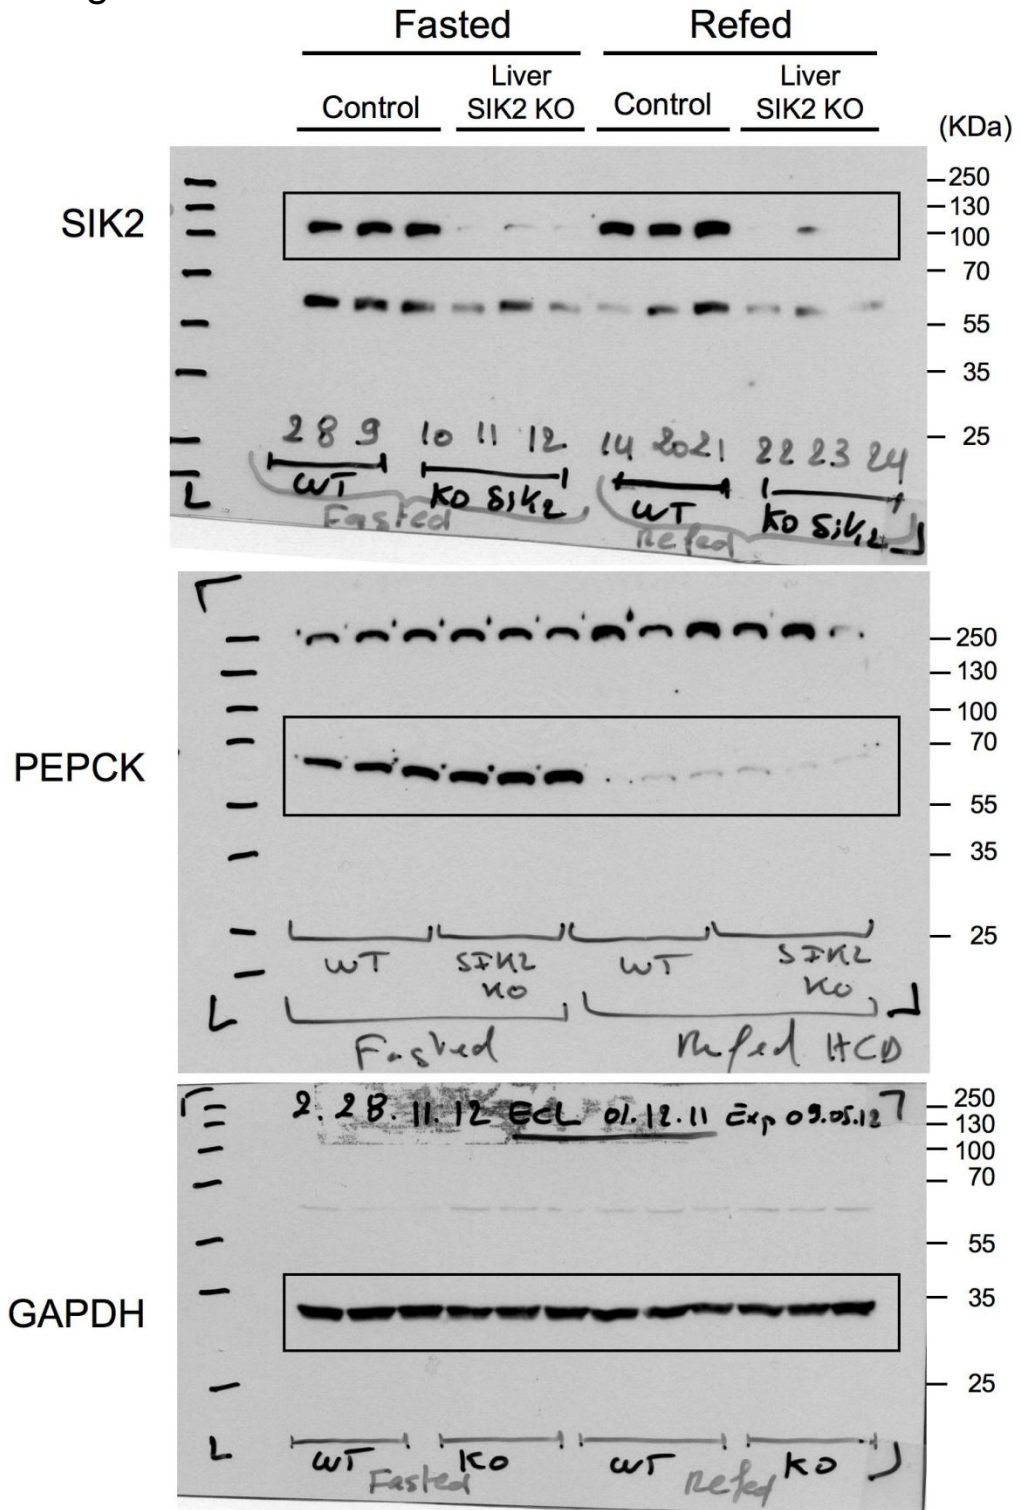

Fig3A

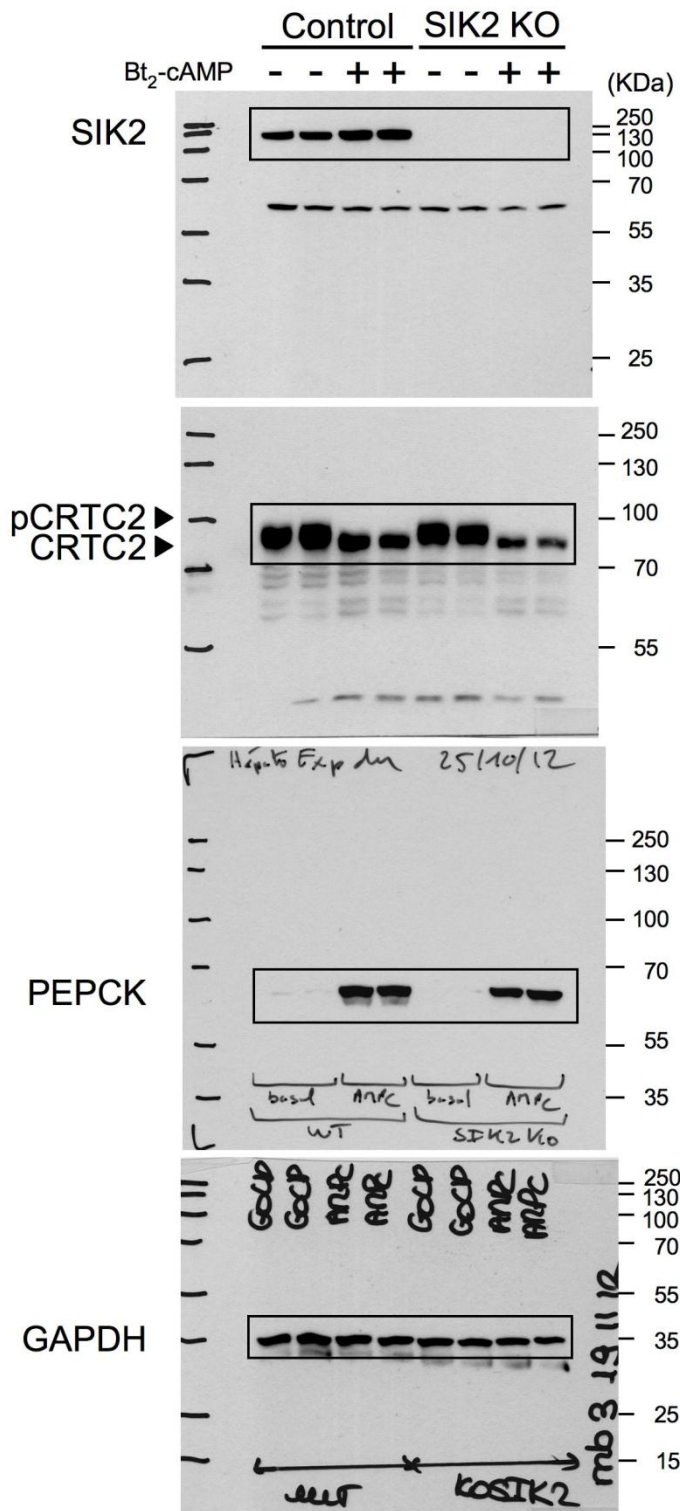



Fig4B

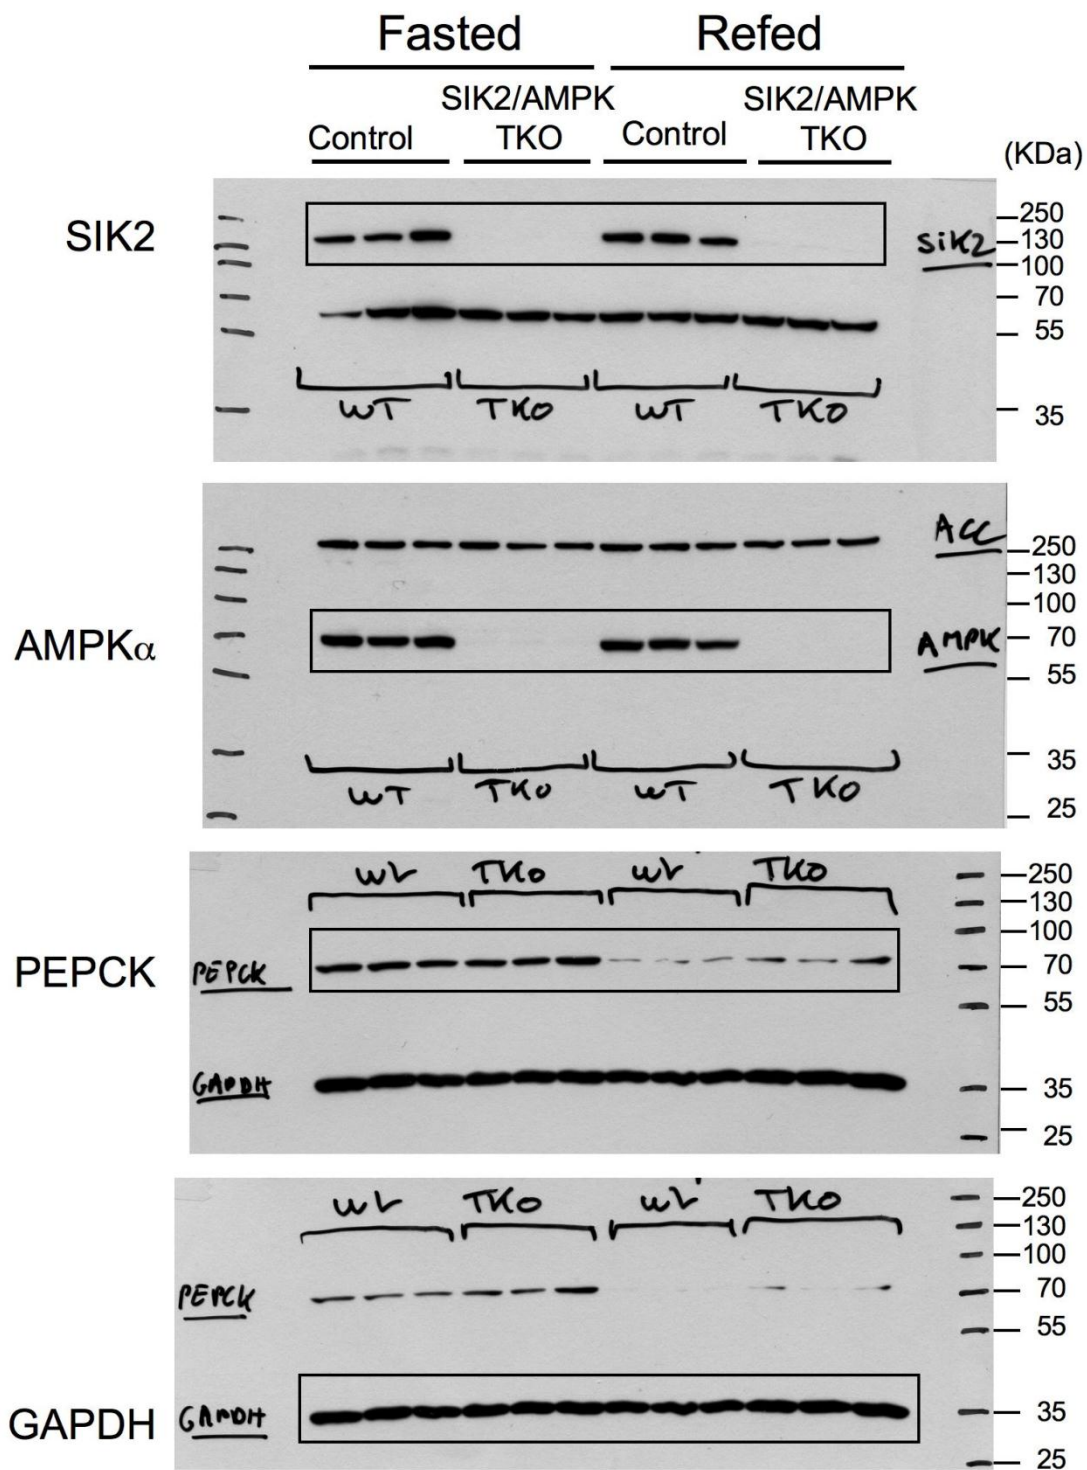

Fig5B

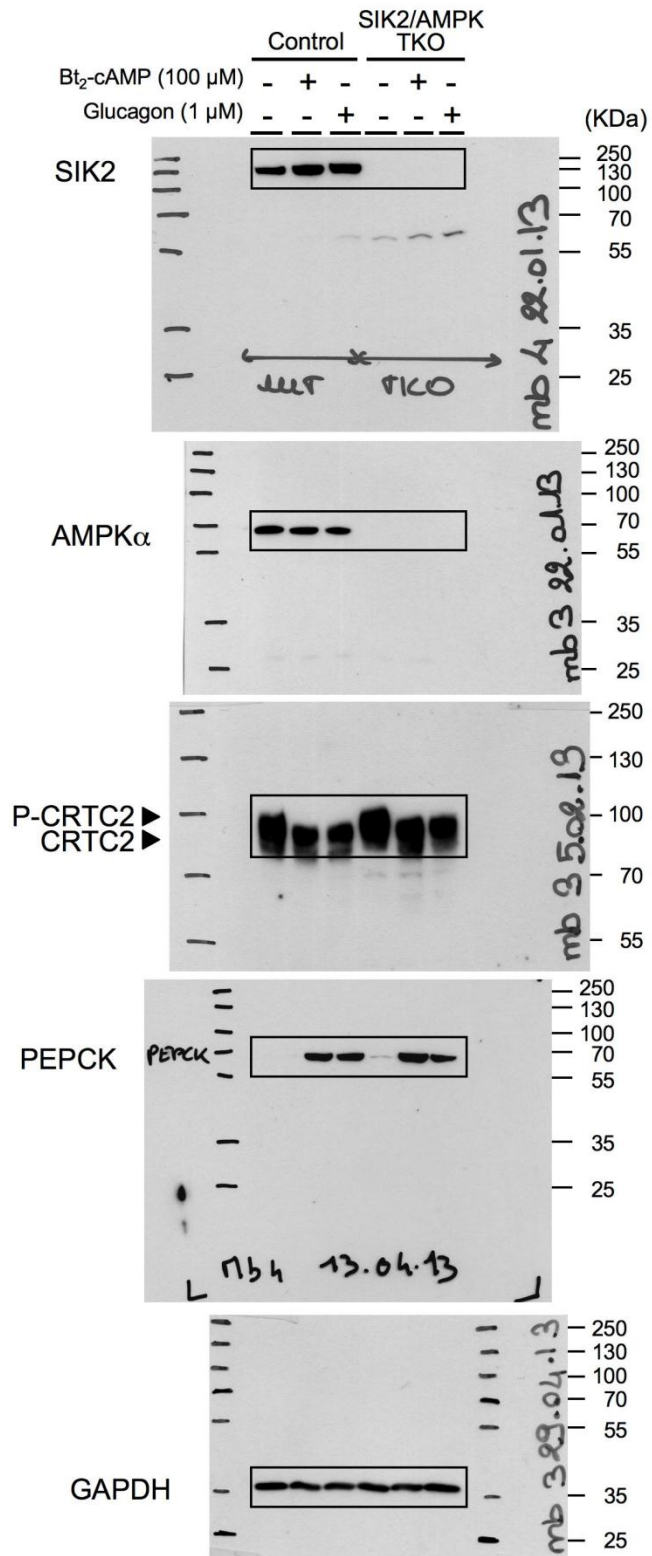

Fig5C

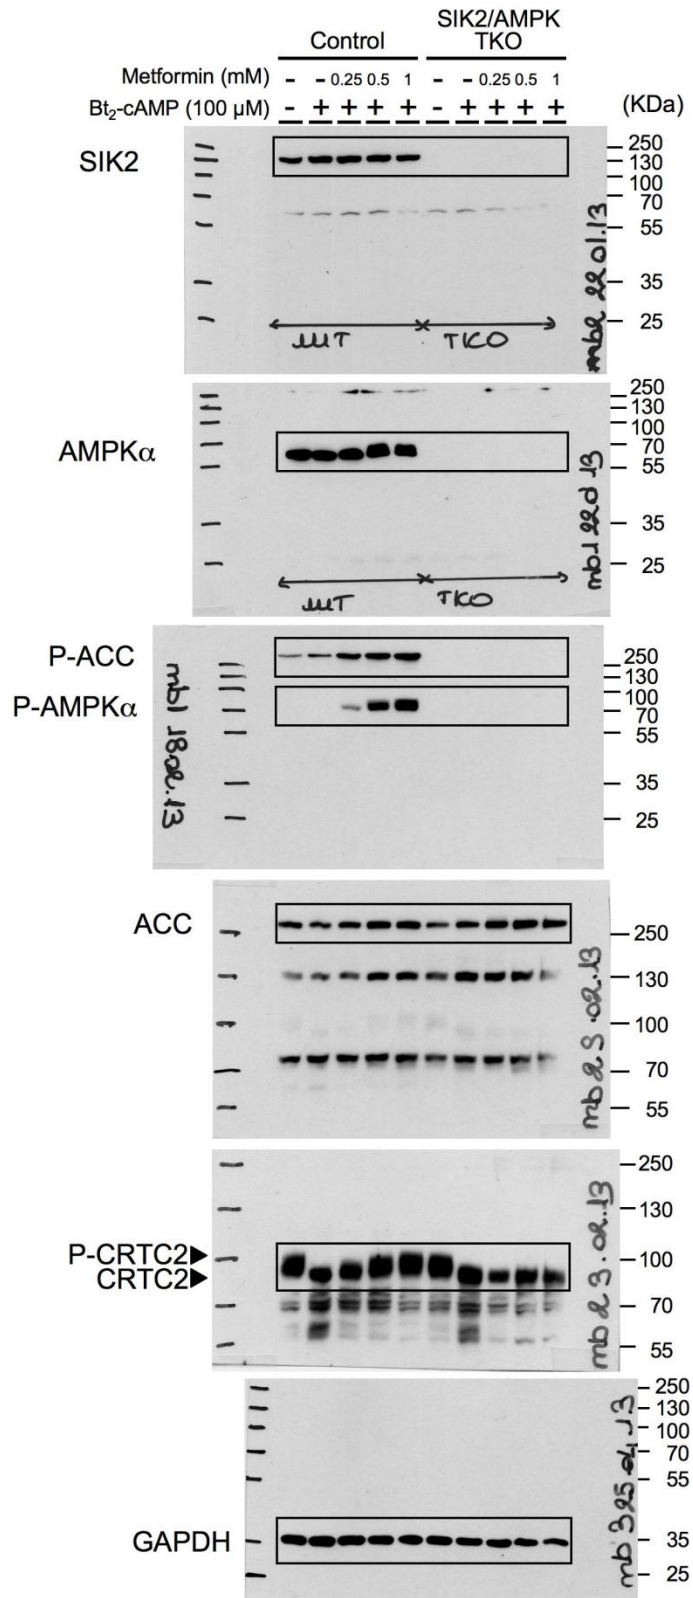



Fig6A

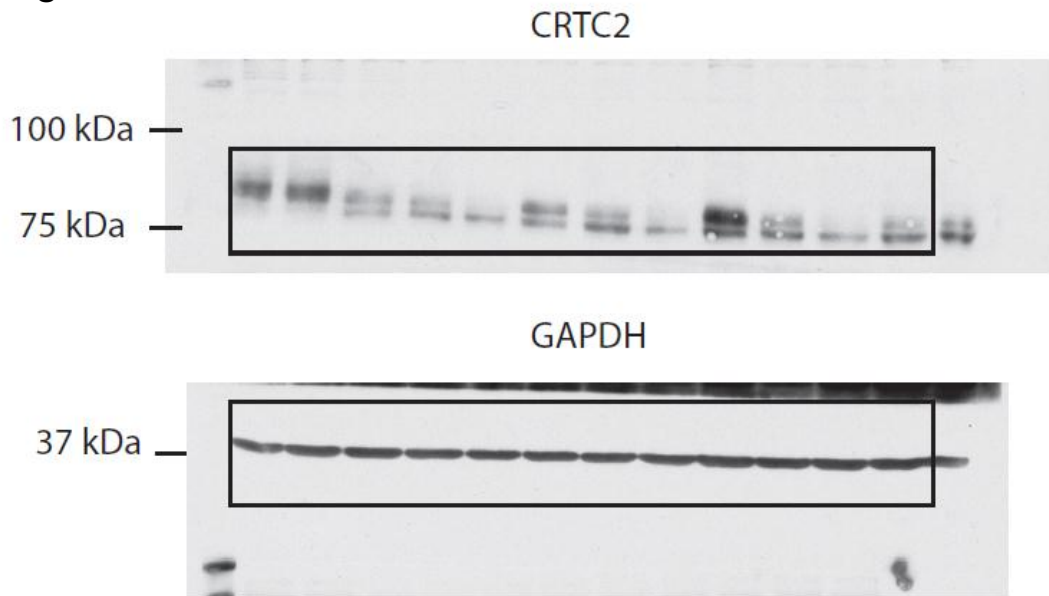

Fig6F

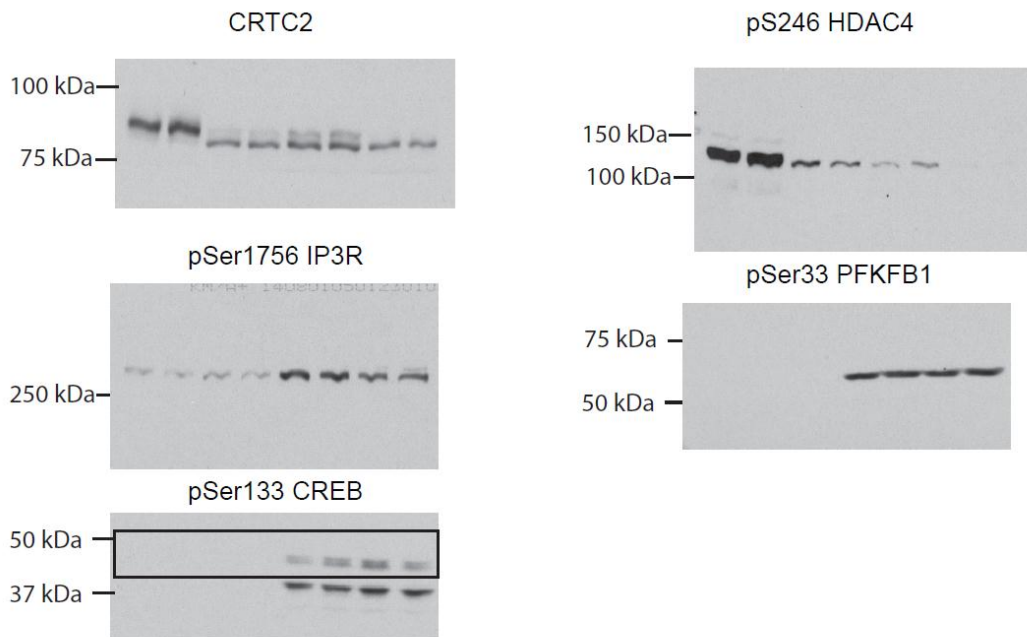

Fig7B

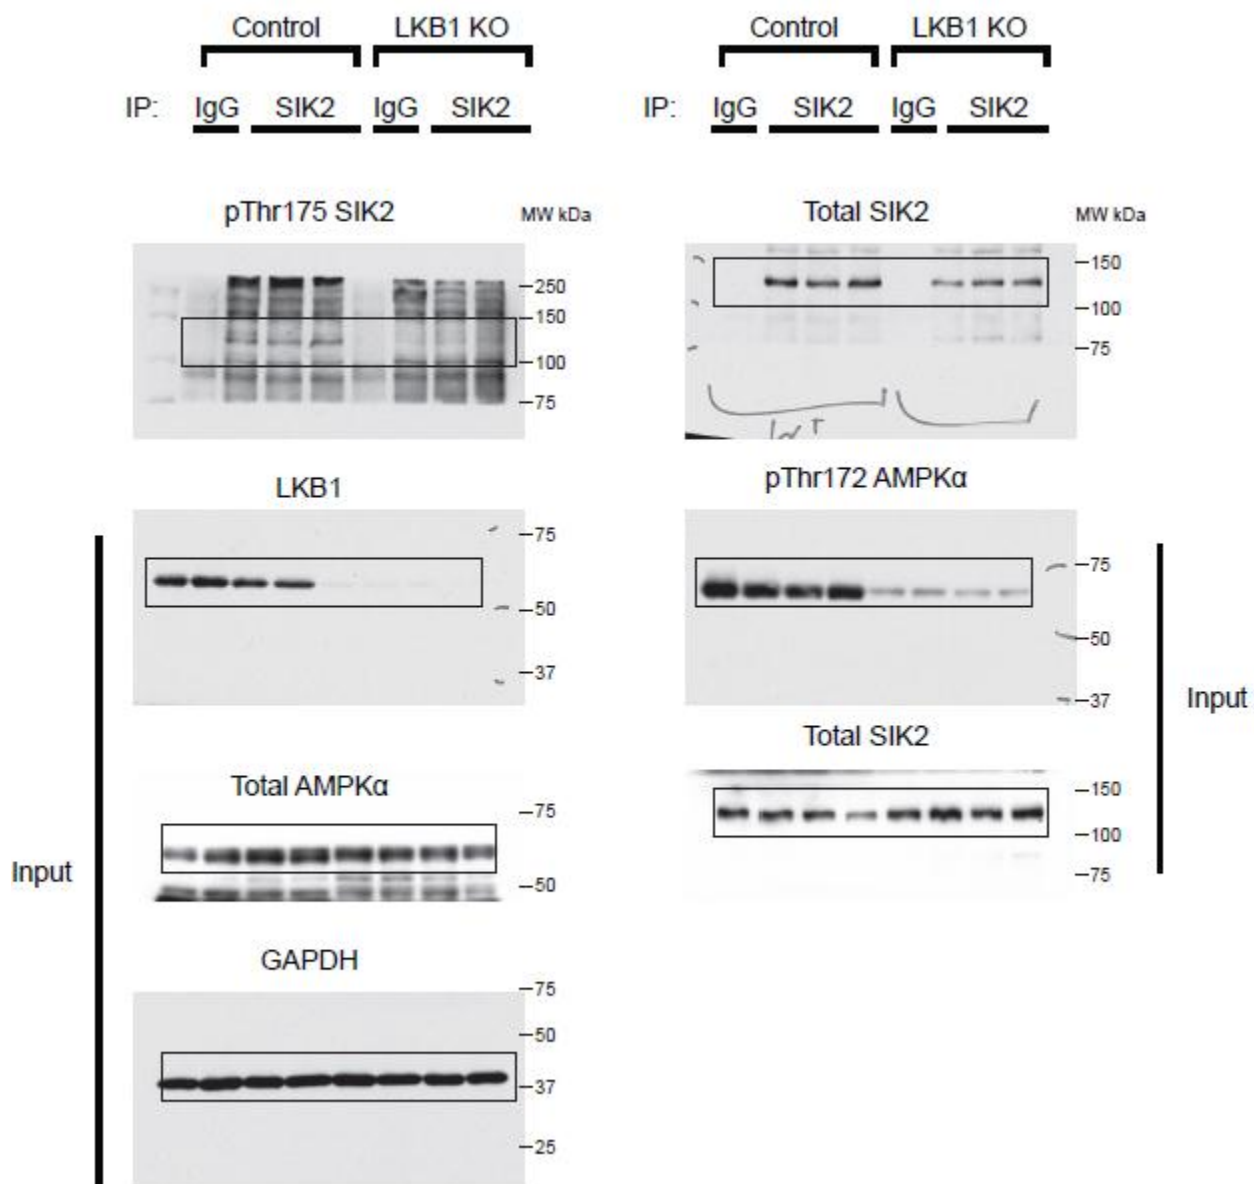

Fig7C

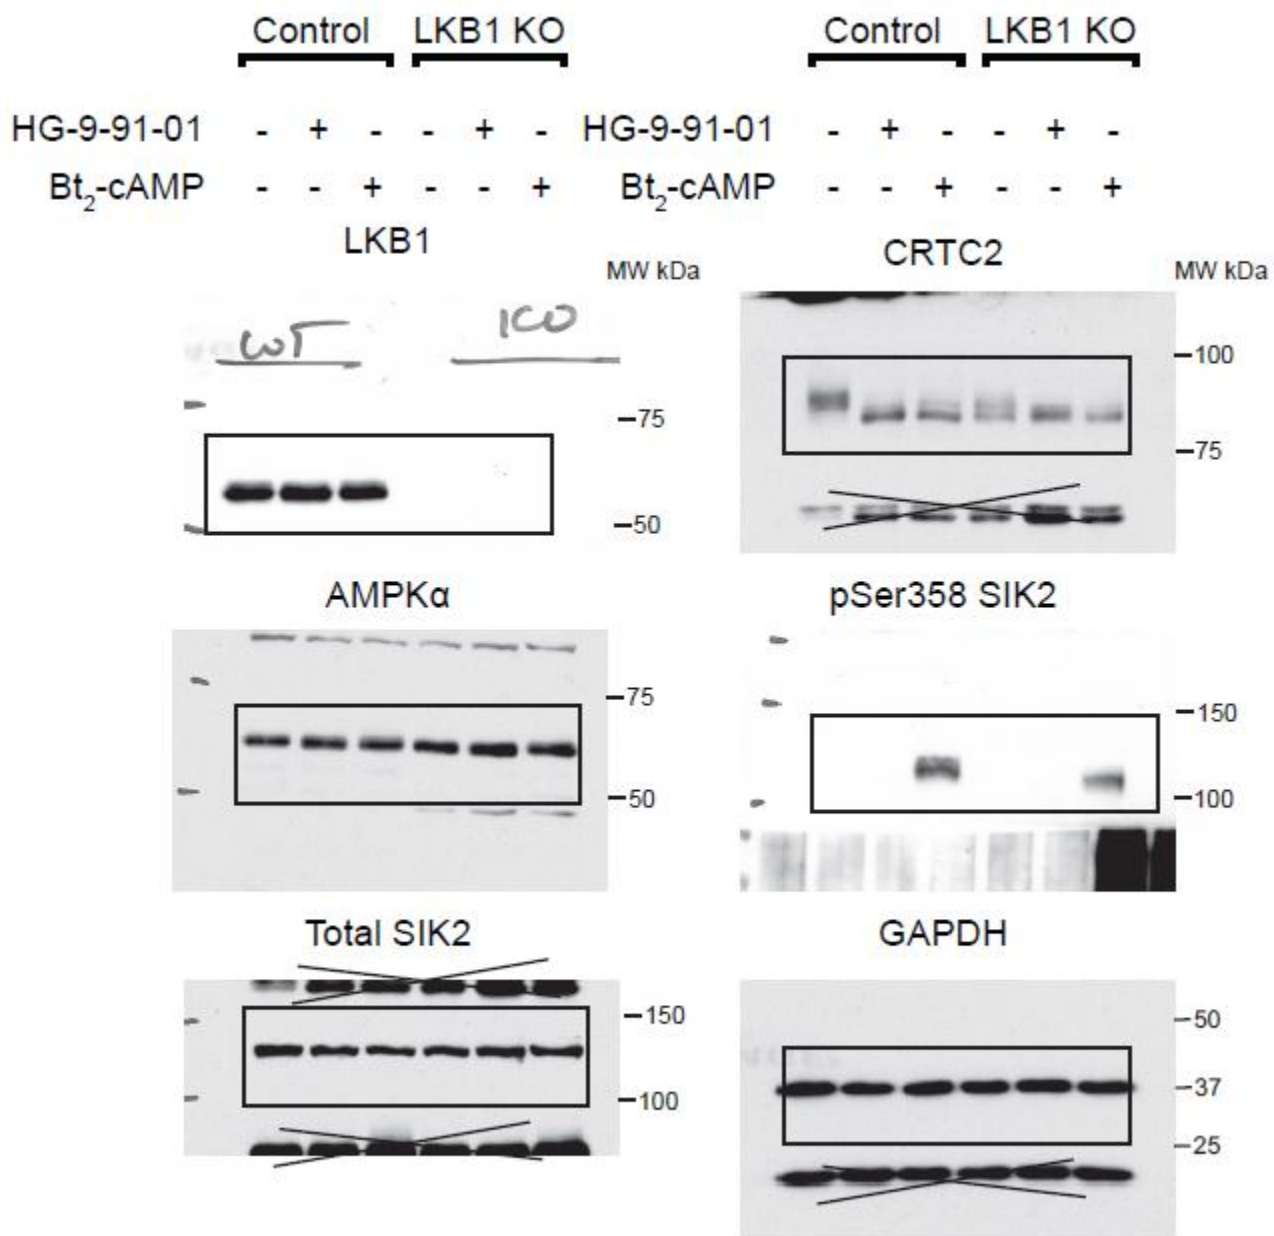

Fig8B

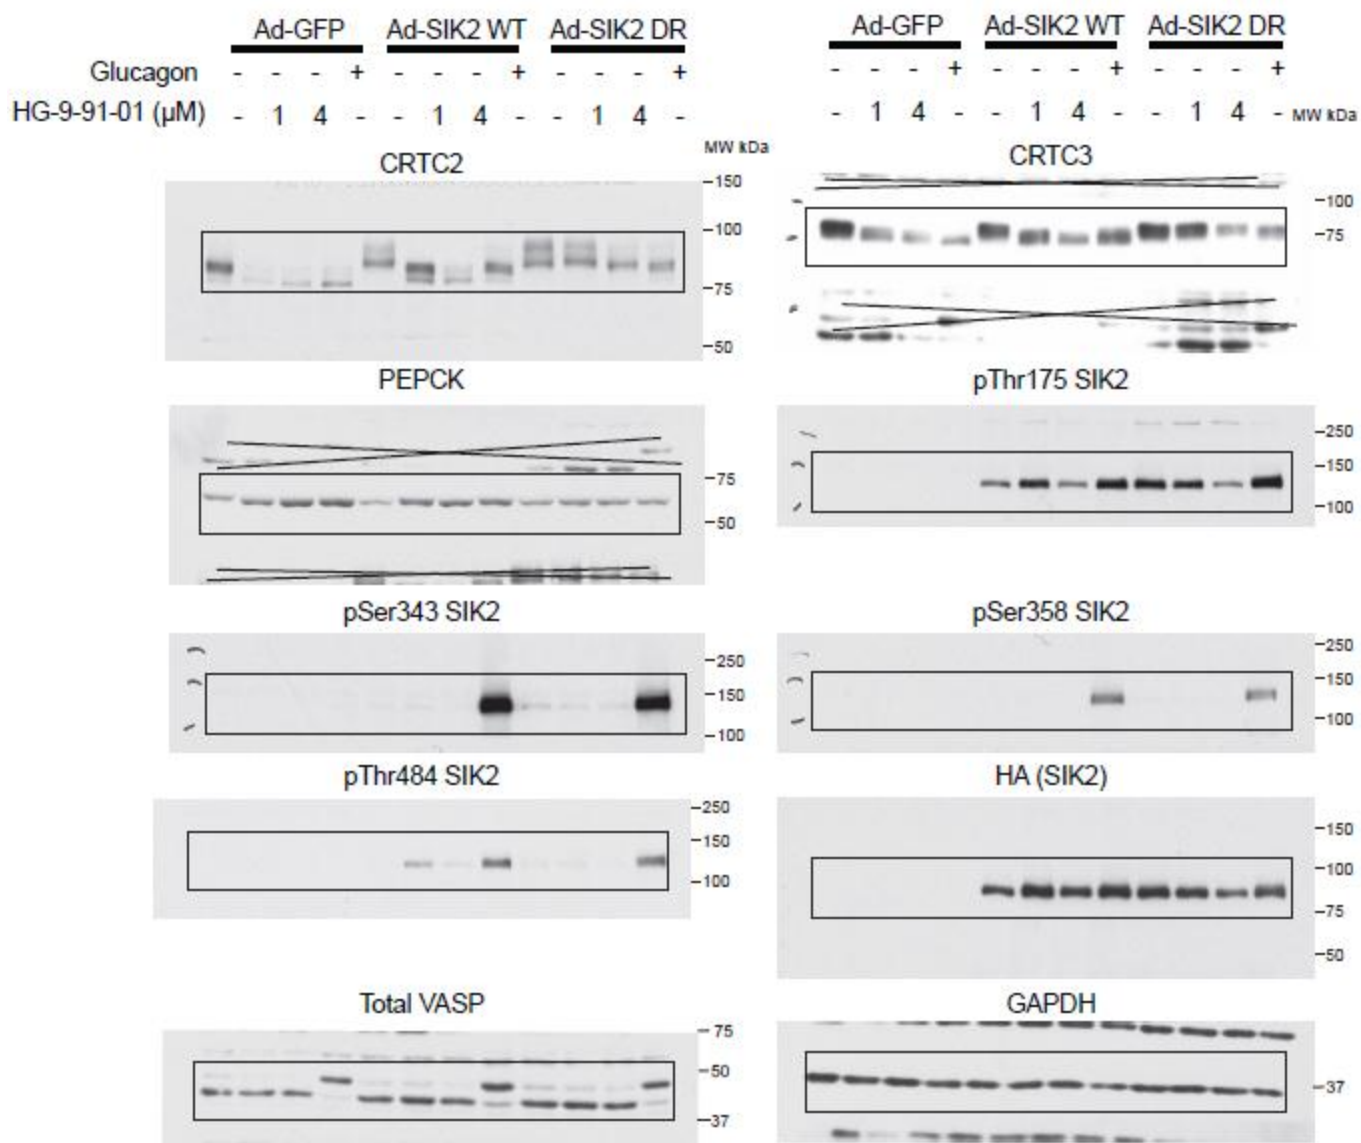

Supplement: ncomms5535-s1.pdf [file ncomms5535-s1.pdf]
